# Supplementary material for: Effects of Prepolymerization, Temperature, and Hydrogen Concentration on Kinetics of Propylene Bulk Polymerization Using a Commercial Ziegler-Natta Catalyst
Source: Hindawi journal article supplement (doi:10.1155/2022/9980759), 2022-10-10
Supplement: f1 [file 9980759.f1.pdf]

| NO      | 1 NO            |         | 2 NO            |          | 3 NO            |         | 4 NO            |          | 5               |
|---------|-----------------|---------|-----------------|----------|-----------------|---------|-----------------|----------|-----------------|
| t       | H=0.120T=70,pre | t       | H=0.075T=70,pre | t        | H=0.030T=80,pre | t       | H=0.030T=70,pre | t        | H=0.030T=50,pre |
| min     | KgPP/(min·gcat) |         | KgPP/(min·gcat) |          | KgPP/(min·gcat) |         | KgPP/(min·gcat) |          | KgPP/(min·gcat) |
|         | 0               | 0       | 0               | 0        | 0               | 0       | 0               | 0        | 0               |
| 0.72362 | 3.55            |         | 6.83333         | 4.43333  | 1.50177         | 3.55    | 0.99165         | 5.18333  | 1.17154         |
| 0.71212 | 3.7             | 1.405   | 6.96667         | 4.78333  | 2.22566         | 3.7     | 0.41235         | 5.31667  | 1.12578         |
| 0.70061 | 3.83333         | 1.53492 | 7.1             | 5.11667  | 2.49697         | 3.83333 | 0.13676         | 5.46667  | 0.66787         |
| 0.81056 | 3.96667         | 1.66487 | 7.23333         | 5.46667  | 2.85916         | 3.96667 | 0.77427         | 5.6      | 1.04614         |
| 0.73288 | 4.1             | 1.79479 | 7.38333         | 5.8      | 3.2446          | 4.1     | 1.0339          | 5.73333  | 0.7675          |
| 0.85063 | 4.23333         | 1.65051 | 7.51667         | 6.15     | 3.44772         | 4.23333 | 0.63258         | 5.86667  | 0.86513         |
| 0.82115 | 4.38333         | 1.54338 | 7.65            | 6.48333  | 3.89734         | 4.38333 | 1.00691         | 6        | 0.86718         |
| 0.81156 | 4.51667         | 1.29808 | 7.78333         | 6.83333  | 3.91091         | 4.51667 | 1.40705         | 6.15     | 0.86549         |
| 0.82569 | 4.65            | 1.24187 | 7.91667         | 7.16667  | 3.93054         | 4.65    | 1.34633         | 6.28333  | 0.83474         |
| 0.85063 | 4.78333         | 1.09955 | 8.06667         | 7.51667  | 4.23396         | 4.78333 | 1.2595          | 6.41667  | 0.90961         |
| 0.83944 | 4.91667         | 1.00927 | 8.2             | 7.85     | 4.18078         | 4.91667 | 1.68633         | 6.55     | 0.84799         |
| 0.87484 | 5.06667         | 0.88407 | 8.33333         | 8.2      | 4.27424         | 5.06667 | 1.82098         | 6.68333  | 0.83739         |
| 0.88649 | 5.2             | 0.81562 | 8.46667         | 8.53333  | 4.24858         | 5.2     | 1.56627         | 6.83333  | 0.78155         |
| 0.8897  | 5.33333         | 0.66999 | 8.6             | 8.88333  | 4.26153         | 5.33333 | 2.01151         | 6.96667  | 0.79853         |
| 0.91624 | 5.46667         | 0.60439 | 8.75            | 9.21667  | 4.21275         | 5.46667 | 2.25219         | 7.1      | 0.78753         |
| 0.92298 | 5.6             | 0.51725 | 8.88333         | 9.56667  | 4.10236         | 5.6     | 1.99265         | 7.23333  | 0.74378         |
| 0.85109 | 5.75            | 0.46071 | 9.01667         | 9.9      | 3.83981         | 5.75    | 2.28169         | 7.36667  | 0.73085         |
| 0.90313 | 5.88333         | 0.40921 | 9.15            | 10.25    | 3.69024         | 5.88333 | 2.12355         | 7.51667  | 0.67874         |
| 0.88988 | 6.01667         | 0.33998 | 9.28333         | 10.58333 | 3.46251         | 6.01667 | 2.51256         | 7.65     | 0.66237         |
| 0.88777 | 6.15            | 0.34788 | 9.43333         | 10.93333 | 3.31191         | 6.15    | 2.48424         | 7.78333  | 0.65185         |
| 0.86333 | 6.28333         | 0.36503 | 9.56667         | 11.26667 | 3.01918         | 6.28333 | 2.51271         | 7.91667  | 0.69223         |
| 0.84623 | 6.43333         | 0.31996 | 9.7             | 11.61667 | 2.93884         | 6.43333 | 2.60224         | 8.05     | 0.66217         |
| 0.85554 | 6.56667         | 0.32585 | 9.83333         | 11.95    | 2.76949         | 6.56667 | 2.72467         | 8.2      | 0.62158         |
| 0.84128 | 6.7             | 0.36061 | 9.96667         | 12.3     | 2.48706         | 6.7     | 2.78352         | 8.33333  | 0.64438         |
| 0.86237 | 6.83333         | 0.3546  | 10.11667        | 12.63333 | 2.33829         | 6.83333 | 2.93732         | 8.46667  | 0.62977         |
| 0.87273 | 6.96667         | 0.35209 | 10.25           | 12.98333 | 2.29151         | 6.96667 | 2.86837         | 8.6      | 0.62086         |
| 0.85842 | 7.11667         | 0.40457 | 10.38333        | 13.31667 | 1.98809         | 7.11667 | 2.99947         | 8.73333  | 0.60496         |
| 0.85297 | 7.25            | 0.40674 | 10.51667        | 13.66667 | 1.99704         | 7.25    | 3.13731         | 8.88333  | 0.59107         |
| 0.82748 | 7.38333         | 0.41522 | 10.65           | 14       | 1.8009          | 7.38333 | 2.94539         | 9.01667  | 0.57365         |
| 0.79011 | 7.51667         | 0.42169 | 10.8            | 14.35    | 1.66086         | 7.51667 | 3.17927         | 9.15     | 0.58368         |
| 0.81001 | 7.65            | 0.42254 | 10.93333        | 14.68333 | 1.59834         | 7.65    | 3.23009         | 9.28333  | 0.56988         |
| 0.78231 | 7.8             | 0.40597 | 11.06667        | 15.03333 | 1.52263         | 7.8     | 3.13608         | 9.41667  | 0.53062         |
| 0.79341 | 7.93333         | 0.4239  | 11.2            | 15.36667 | 1.37334         | 7.93333 | 3.33701         | 9.56667  | 0.53672         |
| 0.78974 | 8.06667         | 0.43045 | 11.33333        | 15.71667 | 1.26406         | 8.06667 | 3.37148         | 9.7      | 0.5376          |
| 0.78791 | 8.2             | 0.43068 | 11.48333        | 16.05    | 1.24274         | 8.2     | 3.39547         | 9.83333  | 0.53355         |
| 0.7703  | 8.33333         | 0.42274 | 11.61667        | 16.4     | 1.08818         | 8.33333 | 3.40281         | 9.96667  | 0.51107         |
| 0.74783 | 8.48333         | 0.43858 | 11.75           | 16.73333 | 1.12938         | 8.48333 | 3.62964         | 10.1     | 0.49208         |
| 0.75109 | 8.61667         | 0.43712 | 11.88333        | 17.08333 | 0.99206         | 8.61667 | 3.48722         | 10.25    | 0.49107         |
| 0.77415 | 8.75            | 0.44843 | 12.01667        | 17.41667 | 1.00332         | 8.75    | 3.51332         | 10.38333 | 0.48582         |
| 0.74586 | 8.88333         | 0.47746 | 12.16667        | 17.76667 | 0.92641         | 8.88333 | 3.63506         | 10.51667 | 0.45097         |
| 0.76553 | 9.01667         | 0.43473 | 12.3            | 18.1     | 0.87466         | 9.01667 | 3.54523         | 10.65    | 0.46161         |
| 0.70226 | 9.16667         | 0.4739  | 12.43333        | 18.45    | 0.8028          | 9.16667 | 3.50022         | 10.78333 | 0.48056         |
| 0.70478 | 9.3             | 0.46816 | 12.56667        | 18.78333 | 0.81199         | 9.3     | 3.41856         | 10.93333 | 0.44953         |
| 0.68648 | 9.43333         | 0.48667 | 12.7            | 19.13333 | 0.73199         | 9.43333 | 3.62998         | 11.06667 | 0.43656         |
| 0.66168 | 9.56667         | 0.43099 | 12.85           | 19.46667 | 0.71989         | 9.56667 | 3.36114         | 11.2     | 0.42753         |
| 0.61876 | 9.7             | 0.43802 | 12.98333        | 19.81667 | 0.72393         | 9.7     | 3.69376         | 11.33333 | 0.42432         |

|         |          |         |          |          |         |          |         |          |         |
|---------|----------|---------|----------|----------|---------|----------|---------|----------|---------|
| 0.63678 | 9.85     | 0.4473  | 13.11667 | 20.15    | 0.64052 | 9.85     | 3.35814 | 11.46667 | 0.43238 |
| 0.60482 | 9.98333  | 0.43646 | 13.25    | 20.5     | 0.67747 | 9.98333  | 3.0827  | 11.61667 | 0.44294 |
| 0.61005 | 10.11667 | 0.45457 | 13.38333 | 20.83333 | 0.62248 | 10.11667 | 3.488   | 11.75    | 0.41994 |
| 0.56085 | 10.25    | 0.44284 | 13.53333 | 21.18333 | 0.59795 | 10.25    | 3.11825 | 11.88333 | 0.40272 |
| 0.58057 | 10.38333 | 0.4548  | 13.66667 | 21.51667 | 0.66066 | 10.38333 | 3.03926 | 12.01667 | 0.41701 |
| 0.57708 | 10.53333 | 0.43368 | 13.8     | 21.86667 | 0.63599 | 10.53333 | 3.32977 | 12.15    | 0.38815 |
| 0.54301 | 10.66667 | 0.42882 | 13.93333 | 22.2     | 0.62576 | 10.66667 | 3.00577 | 12.3     | 0.37819 |
| 0.53843 | 10.8     | 0.4905  | 14.06667 | 22.55    | 0.62465 | 10.8     | 3.2458  | 12.43333 | 0.38128 |
| 0.5205  | 10.93333 | 0.42493 | 14.21667 | 22.88333 | 0.6252  | 10.93333 | 2.99651 | 12.56667 | 0.37602 |
| 0.52114 | 11.06667 | 0.44396 | 14.35    | 23.23333 | 0.68235 | 11.06667 | 2.97194 | 12.7     | 0.36547 |
| 0.50046 | 11.21667 | 0.41163 | 14.48333 | 23.56667 | 0.66165 | 11.21667 | 2.81282 | 12.83333 | 0.38008 |
| 0.47878 | 11.35    | 0.44083 | 14.61667 | 23.91667 | 0.65798 | 11.35    | 2.84281 | 12.98333 | 0.35398 |
| 0.45787 | 11.48333 | 0.39512 | 14.75    | 24.25    | 0.66739 | 11.48333 | 2.65129 | 13.11667 | 0.34459 |
| 0.46695 | 11.61667 | 0.41322 | 14.9     | 24.6     | 0.63524 | 11.61667 | 2.76894 | 13.25    | 0.33331 |
| 0.44576 | 11.75    | 0.45074 | 15.03333 | 24.93333 | 0.68852 | 11.75    | 2.69039 | 13.38333 | 0.33299 |
| 0.43164 | 11.9     | 0.45226 | 15.16667 | 25.28333 | 0.78462 | 11.9     | 2.52837 | 13.51667 | 0.30918 |
| 0.41683 | 12.03333 | 0.40087 | 15.3     | 25.61667 | 0.67377 | 12.03333 | 2.54526 | 13.66667 | 0.30826 |
| 0.42467 | 12.16667 | 0.43406 | 15.43333 | 25.96667 | 0.68723 | 12.16667 | 2.46819 | 13.8     | 0.30914 |
| 0.37355 | 12.3     | 0.43323 | 15.58333 | 26.3     | 0.71589 | 12.3     | 2.31572 | 13.93333 | 0.29305 |
| 0.3957  | 12.43333 | 0.44963 | 15.71667 | 26.65    | 0.73117 | 12.43333 | 2.36664 | 14.06667 | 0.30372 |
| 0.39441 | 12.58333 | 0.44492 | 15.85    | 26.98333 | 0.74384 | 12.58333 | 2.30897 | 14.2     | 0.27518 |
| 0.36575 | 12.71667 | 0.42576 | 15.98333 | 27.33333 | 0.73134 | 12.71667 | 2.21259 | 14.35    | 0.28365 |
| 0.39139 | 12.85    | 0.37599 | 16.11667 | 27.66667 | 0.68774 | 12.85    | 2.16704 | 14.48333 | 0.25407 |
| 0.35833 | 12.98333 | 0.43601 | 16.26667 | 28.01667 | 0.74146 | 12.98333 | 2.25022 | 14.61667 | 0.28285 |
| 0.3592  | 13.11667 | 0.43261 | 16.4     | 28.35    | 0.70504 | 13.11667 | 1.91573 | 14.75    | 0.27033 |
| 0.33921 | 13.26667 | 0.42628 | 16.53333 | 28.7     | 0.737   | 13.26667 | 2.11016 | 14.88333 | 0.25909 |
| 0.35218 | 13.4     | 0.42685 | 16.66667 | 29.03333 | 0.74753 | 13.4     | 1.87042 | 15.03333 | 0.23123 |
| 0.34714 | 13.53333 | 0.43171 | 16.8     | 29.38333 | 0.78172 | 13.53333 | 1.95577 | 15.16667 | 0.23355 |
| 0.34517 | 13.66667 | 0.38939 | 16.95    | 29.71667 | 0.745   | 13.66667 | 1.78783 | 15.3     | 0.24359 |
| 0.31706 | 13.8     | 0.3928  | 17.08333 | 30.06667 | 0.73388 | 13.8     | 1.8324  | 15.43333 | 0.22175 |
| 0.34141 | 13.95    | 0.42842 | 17.21667 | 30.4     | 0.75821 | 13.95    | 1.82383 | 15.56667 | 0.23913 |
| 0.33522 | 14.08333 | 0.41015 | 17.35    | 30.75    | 0.79417 | 14.08333 | 1.70268 | 15.71667 | 0.23042 |
| 0.34971 | 14.21667 | 0.43156 | 17.48333 | 31.08333 | 0.7379  | 14.21667 | 1.70012 | 15.85    | 0.21051 |
| 0.32976 | 14.35    | 0.4267  | 17.63333 | 31.43333 | 0.77795 | 14.35    | 1.56927 | 15.98333 | 0.23078 |
| 0.32793 | 14.48333 | 0.4165  | 17.76667 | 31.76667 | 0.77694 | 14.48333 | 1.56238 | 16.11667 | 0.23259 |
| 0.33292 | 14.63333 | 0.36979 | 17.9     | 32.11667 | 0.77633 | 14.63333 | 1.45004 | 16.25    | 0.22737 |
| 0.31546 | 14.76667 | 0.38703 | 18.03333 | 32.45    | 0.78498 | 14.76667 | 1.49205 | 16.4     | 0.22027 |
| 0.33059 | 14.9     | 0.39097 | 18.16667 | 32.8     | 0.76124 | 14.9     | 1.40454 | 16.53333 | 0.23219 |
| 0.32169 | 15.03333 | 0.36835 | 18.31667 | 33.13333 | 0.73898 | 15.03333 | 1.40272 | 16.66667 | 0.21786 |
| 0.32362 | 15.16667 | 0.4145  | 18.45    | 33.48333 | 0.77359 | 15.16667 | 1.4069  | 16.8     | 0.21565 |
| 0.3194  | 15.31667 | 0.37637 | 18.58333 | 33.81667 | 0.72153 | 15.31667 | 1.22252 | 16.93333 | 0.21437 |
| 0.32596 | 15.45    | 0.38187 | 18.71667 | 34.16667 | 0.74748 | 15.45    | 1.24227 | 17.08333 | 0.2238  |
| 0.30381 | 15.58333 | 0.39277 | 18.85    | 34.5     | 0.78862 | 15.58333 | 1.18263 | 17.21667 | 0.20606 |
| 0.30042 | 15.71667 | 0.38551 | 19       | 34.85    | 0.70682 | 15.71667 | 1.20213 | 17.35    | 0.19606 |
| 0.29987 | 15.85    | 0.40341 | 19.13333 | 35.18333 | 0.74982 | 15.85    | 1.17411 | 17.48333 | 0.20541 |
| 0.30647 | 16       | 0.37874 | 19.26667 | 35.53333 | 0.71871 | 16       | 1.22193 | 17.61667 | 0.2173  |
| 0.30399 | 16.13333 | 0.40558 | 19.4     | 35.86667 | 0.72551 | 16.13333 | 1.0141  | 17.76667 | 0.20658 |
| 0.30436 | 16.26667 | 0.37244 | 19.53333 | 36.21667 | 0.73226 | 16.26667 | 1.19204 | 17.9     | 0.19201 |
| 0.31027 | 16.4     | 0.38012 | 19.68333 | 36.55    | 0.71274 | 16.4     | 1.10782 | 18.03333 | 0.19919 |
| 0.3105  | 16.53333 | 0.3738  | 19.81667 | 36.9     | 0.70102 | 16.53333 | 0.9622  | 18.16667 | 0.1971  |

|         |          |         |          |          |         |          |         |          |         |
|---------|----------|---------|----------|----------|---------|----------|---------|----------|---------|
| 0.27777 | 16.68333 | 0.40274 | 19.95    | 37.23333 | 0.70102 | 16.68333 | 1.06522 | 18.3     | 0.19092 |
| 0.30743 | 16.81667 | 0.42762 | 20.08333 | 37.58333 | 0.70102 | 16.81667 | 0.94969 | 18.45    | 0.20152 |
| 0.29326 | 16.95    | 0.36366 | 20.21667 | 37.91667 | 0.70102 | 16.95    | 0.95713 | 18.58333 | 0.20963 |
| 0.33059 | 17.08333 | 0.39955 | 20.36667 | 38.26667 | 0.70102 | 17.08333 | 1.02474 | 18.71667 | 0.20911 |
| 0.30193 | 17.21667 | 0.37311 | 20.5     | 38.6     | 0.70102 | 17.21667 | 0.80815 | 18.85    | 0.21533 |
| 0.30794 | 17.36667 | 0.39605 | 20.63333 | 38.95    | 0.70102 | 17.36667 | 0.96555 | 18.98333 | 0.21131 |
| 0.30312 | 17.5     | 0.36299 | 20.76667 | 39.28333 | 0.70102 | 17.5     | 1.00032 | 19.13333 | 0.20309 |
| 0.30514 | 17.63333 | 0.36411 | 20.9     | 39.63333 | 0.70102 | 17.63333 | 0.85159 | 19.26667 | 0.21902 |
| 0.3172  | 17.76667 | 0.36566 | 21.05    | 39.96667 | 0.70102 | 17.76667 | 0.87597 | 19.4     | 0.2002  |
| 0.30601 | 17.9     | 0.39069 | 21.18333 | 40.31667 | 0.73746 | 17.9     | 0.83514 | 19.53333 | 0.20401 |
| 0.32119 | 18.05    | 0.36225 | 21.31667 | 40.65    | 0.73746 | 18.05    | 0.82696 | 19.66667 | 0.20385 |
| 0.30702 | 18.18333 | 0.34713 | 21.45    | 41       | 0.73746 | 18.18333 | 0.7949  | 19.81667 | 0.19783 |
| 0.29024 | 18.31667 | 0.36311 | 21.58333 | 41.33333 | 0.73746 | 18.31667 | 0.6675  | 19.95    | 0.19606 |
| 0.30743 | 18.45    | 0.38001 | 21.73333 | 41.68333 | 0.73746 | 18.45    | 0.80692 | 20.08333 | 0.20341 |
| 0.29987 | 18.58333 | 0.37772 | 21.86667 | 42.01667 | 0.77227 | 18.58333 | 0.73408 | 20.21667 | 0.19947 |
| 0.31523 | 18.73333 | 0.37988 | 22       | 42.36667 | 0.78388 | 18.73333 | 0.66632 | 20.35    | 0.20216 |
| 0.31    | 18.86667 | 0.37814 | 22.13333 | 42.7     | 0.78388 | 18.86667 | 0.66425 | 20.5     | 0.22223 |
| 0.30647 | 19       | 0.36312 | 22.26667 | 43.05    | 0.78388 | 19       | 0.7693  | 20.63333 | 0.18699 |
| 0.31408 | 19.13333 | 0.34638 | 22.41667 | 43.38333 | 0.78388 | 19.13333 | 0.69882 | 20.76667 | 0.18651 |
| 0.29647 | 19.26667 | 0.35028 | 22.55    | 43.73333 | 0.78388 | 19.26667 | 0.70513 | 20.9     | 0.20662 |
| 0.30294 | 19.41667 | 0.34913 | 22.68333 | 44.06667 | 0.78388 | 19.41667 | 0.68533 | 21.03333 | 0.20814 |
| 0.29556 | 19.55    | 0.36019 | 22.81667 | 44.41667 | 0.78388 | 19.55    | 0.67548 | 21.18333 | 0.22344 |
| 0.31325 | 19.68333 | 0.35824 | 22.95    | 44.75    | 0.78388 | 19.68333 | 0.63002 | 21.31667 | 0.20863 |
| 0.31844 | 19.81667 | 0.34558 | 23.1     | 45.1     | 0.78388 | 19.81667 | 0.5921  | 21.45    | 0.21035 |
| 0.30353 | 19.95    | 0.33943 | 23.23333 | 45.43333 | 0.78388 | 19.95    | 0.63391 | 21.58333 | 0.21625 |
| 0.31857 | 20.1     | 0.34883 | 23.36667 | 45.78333 | 0.78388 | 20.1     | 0.63707 | 21.71667 | 0.21228 |
| 0.29611 | 20.23333 | 0.24729 | 23.5     | 46.11667 | 0.78388 | 20.23333 | 0.77575 | 21.86667 | 0.21637 |
| 0.31147 | 20.36667 | 0.28795 | 23.63333 | 46.46667 | 0.78388 | 20.36667 | 0.60486 | 22       | 0.22842 |
| 0.32389 | 20.5     | 0.39564 | 23.78333 | 46.8     | 0.60445 | 20.5     | 0.54684 | 22.13333 | 0.22007 |
| 0.31729 | 20.63333 | 0.36526 | 23.91667 | 47.15    | 0.61988 | 20.63333 | 0.63933 | 22.26667 | 0.22079 |
| 0.30885 | 20.78333 | 0.3496  | 24.05    | 47.48333 | 0.59692 | 20.78333 | 0.61052 | 22.4     | 0.21637 |
| 0.31692 | 20.91667 | 0.33783 | 24.18333 | 47.83333 | 0.61323 | 20.91667 | 0.58698 | 22.55    | 0.23062 |
| 0.30794 | 21.05    | 0.35826 | 24.31667 | 48.16667 | 0.60887 | 21.05    | 0.55955 | 22.68333 | 0.22071 |
| 0.29592 | 21.18333 | 0.33464 | 24.46667 | 48.51667 | 0.58749 | 21.18333 | 0.54093 | 22.81667 | 0.21926 |
| 0.31376 | 21.31667 | 0.3343  | 24.6     | 48.85    | 0.6241  | 21.31667 | 0.58235 | 22.95    | 0.21706 |
| 0.29413 | 21.46667 | 0.34519 | 24.73333 | 49.2     | 0.6168  | 21.46667 | 0.6348  | 23.08333 | 0.22536 |
| 0.32637 | 21.6     | 0.32324 | 24.86667 | 49.53333 | 0.58663 | 21.6     | 0.57423 | 23.23333 | 0.22834 |
| 0.30633 | 21.73333 | 0.34927 | 25       | 49.88333 | 0.60639 | 21.73333 | 0.61835 | 23.36667 | 0.22304 |
| 0.32458 | 21.86667 | 0.35121 | 25.15    | 50.21667 | 0.61699 | 21.86667 | 0.6345  | 23.5     | 0.21645 |
| 0.33141 | 22       | 0.33855 | 25.28333 | 50.56667 | 0.63688 | 22       | 0.58866 | 23.63333 | 0.21244 |
| 0.33169 | 22.15    | 0.33462 | 25.41667 | 50.9     | 0.5828  | 22.15    | 0.53374 | 23.76667 | 0.21051 |
| 0.32334 | 22.28333 | 0.31813 | 25.55    | 51.25    | 0.60548 | 22.28333 | 0.55684 | 23.91667 | 0.24198 |
| 0.31967 | 22.41667 | 0.32938 | 25.68333 | 51.58333 | 0.58465 | 22.41667 | 0.61082 | 24.05    | 0.22693 |
| 0.32357 | 22.55    | 0.33546 | 25.83333 | 51.93333 | 0.56813 | 22.55    | 0.60574 | 24.18333 | 0.23396 |
| 0.32939 | 22.68333 | 0.33179 | 25.96667 | 52.26667 | 0.52373 | 22.68333 | 0.51114 | 24.31667 | 0.22978 |
| 0.32284 | 22.83333 | 0.33857 | 26.1     | 52.61667 | 0.52373 | 22.83333 | 0.61441 | 24.45    | 0.21838 |
| 0.31408 | 22.96667 | 0.33821 | 26.23333 | 52.95    | 0.53626 | 22.96667 | 0.47681 | 24.6     | 0.22167 |
| 0.32912 | 23.1     | 0.3587  | 26.36667 | 53.3     | 0.56434 | 23.1     | 0.70734 | 24.73333 | 0.21332 |
| 0.33756 | 23.23333 | 0.31169 | 26.51667 | 53.63333 | 0.59399 | 23.23333 | 0.64465 | 24.86667 | 0.22247 |
| 0.33435 | 23.36667 | 0.30791 | 26.65    | 53.98333 | 0.58246 | 23.36667 | 0.54665 | 25       | 0.22793 |

|         |          |         |          |          |         |          |         |          |         |
|---------|----------|---------|----------|----------|---------|----------|---------|----------|---------|
| 0.31546 | 23.51667 | 0.36612 | 26.78333 | 54.31667 | 0.6019  | 23.51667 | 0.56211 | 25.13333 | 0.21995 |
| 0.31133 | 23.65    | 0.27215 | 26.91667 | 54.66667 | 0.5679  | 23.65    | 0.71153 | 25.28333 | 0.2415  |
| 0.32972 | 23.78333 | 0.32766 | 27.05    | 55       | 0.59    | 23.78333 | 0.64169 | 25.41667 | 0.22866 |
| 0.32206 | 23.91667 | 0.35306 | 27.2     | 55.35    | 0.58189 | 23.91667 | 0.67124 | 25.55    | 0.22231 |
| 0.30463 | 24.05    | 0.29869 | 27.33333 | 55.68333 | 0.62941 | 24.05    | 0.53798 | 25.68333 | 0.23564 |
| 0.30651 | 24.2     | 0.32903 | 27.46667 | 56.03333 | 0.61634 | 24.2     | 0.72926 | 25.81667 | 0.21633 |
| 0.3172  | 24.33333 | 0.33584 | 27.6     | 56.36667 | 0.56565 | 24.33333 | 0.61599 | 25.96667 | 0.22508 |
| 0.32357 | 24.46667 | 0.32483 | 27.73333 |          | 0.61167 | 24.46667 | 0.71281 | 26.1     | 0.22898 |
| 0.3271  | 24.6     | 0.29076 | 27.88333 |          | 0.55309 | 24.6     | 0.66809 | 26.23333 | 0.23074 |
| 0.3205  | 24.73333 | 0.35623 | 28.01667 |          | 0.56803 | 24.73333 | 0.64578 | 26.36667 | 0.22288 |
| 0.33366 | 24.88333 |         | 28.15    |          | 0.53638 | 24.88333 | 0.6546  | 26.5     | 0.20778 |
| 0.32719 | 25.01667 |         | 28.28333 |          | 0.53907 | 25.01667 | 0.62663 | 26.65    | 0.21152 |
| 0.30849 | 25.15    |         | 28.41667 |          | 0.57173 | 25.15    | 0.67765 | 26.78333 | 0.22272 |
| 0.32917 | 25.28333 |         | 28.56667 |          | 0.54595 | 25.28333 | 0.65622 | 26.91667 | 0.2189  |
| 0.31903 | 25.41667 |         | 28.7     |          | 0.54658 | 25.41667 | 0.74393 | 27.05    | 0.22292 |
| 0.326   | 25.56667 |         | 28.83333 |          | 0.54273 | 25.56667 | 0.56585 | 27.18333 | 0.22906 |
| 0.32055 | 25.7     |         | 28.96667 |          | 0.53675 | 25.7     | 0.6711  | 27.33333 | 0.22838 |
| 0.32976 | 25.83333 |         | 29.1     |          | 0.53876 | 25.83333 | 0.70729 | 27.46667 | 0.22601 |
| 0.30546 | 25.96667 |         | 29.25    |          | 0.52177 | 25.96667 | 0.64889 | 27.6     | 0.23203 |
| 0.32527 | 26.1     |         | 29.38333 |          | 0.50096 | 26.1     | 0.70946 | 27.73333 | 0.22581 |
| 0.31995 | 26.25    |         | 29.51667 |          |         | 26.25    | 0.83883 | 27.86667 | 0.22858 |
| 0.30308 | 26.38333 |         | 29.65    |          |         | 26.38333 | 0.48972 | 28.01667 | 0.23107 |
| 0.34874 | 26.51667 |         | 29.78333 |          |         | 26.51667 | 0.89808 | 28.15    | 0.23255 |
| 0.32082 | 26.65    |         | 29.93333 |          |         | 26.65    | 0.63056 | 28.28333 | 0.21557 |
| 0.33742 | 26.78333 |         | 30.06667 |          |         | 26.78333 | 0.96584 | 28.41667 | 0.24544 |
| 0.3315  | 26.93333 |         | 30.2     |          |         | 26.93333 | 0.6477  | 28.55    | 0.22777 |
| 0.33673 | 27.06667 |         | 30.33333 |          |         | 27.06667 | 0.8048  | 28.7     | 0.23002 |
| 0.33852 | 27.2     |         | 30.46667 |          |         | 27.2     | 0.78456 | 28.83333 | 0.2238  |
| 0.29235 | 27.33333 |         | 30.61667 |          |         | 27.33333 | 0.75147 | 28.96667 | 0.22605 |
| 0.33242 | 27.46667 |         | 30.75    |          |         | 27.46667 | 0.74876 | 29.1     | 0.23259 |
| 0.32806 | 27.61667 |         | 30.88333 |          |         | 27.61667 | 0.75162 | 29.23333 | 0.22308 |
| 0.29739 | 27.75    |         | 31.01667 |          |         | 27.75    | 0.79431 | 29.38333 | 0.23135 |
| 0.33815 | 27.88333 |         | 31.15    |          |         | 27.88333 | 0.64347 | 29.51667 | 0.23139 |
| 0.3304  | 28.01667 |         | 31.3     |          |         | 28.01667 | 0.72867 | 29.65    | 0.23624 |
| 0.31963 | 28.15    |         | 31.43333 |          |         | 28.15    | 0.71424 | 29.78333 | 0.22625 |
| 0.31174 | 28.3     |         | 31.56667 |          |         | 28.3     | 0.89985 | 29.91667 | 0.24102 |
| 0.28455 | 28.43333 |         | 31.7     |          |         | 28.43333 | 0.68951 | 30.06667 | 0.23215 |
| 0.33517 | 28.56667 |         | 31.83333 |          |         | 28.56667 | 0.75664 | 30.2     | 0.22882 |
| 0.30253 | 28.7     |         | 31.98333 |          |         | 28.7     | 0.81106 | 30.33333 | 0.24162 |
| 0.33059 | 28.83333 |         | 32.11667 |          |         | 28.83333 | 0.72414 | 30.46667 | 0.22737 |
| 0.30349 | 28.98333 |         | 32.25    |          |         | 28.98333 | 0.79072 | 30.6     | 0.23468 |
| 0.32912 | 29.11667 |         | 32.38333 |          |         | 29.11667 | 0.78052 | 30.75    | 0.22681 |
| 0.32389 | 29.25    |         | 32.51667 |          |         | 29.25    | 0.69301 | 30.88333 | 0.22685 |
| 0.31578 | 29.38333 |         | 32.66667 |          |         | 29.38333 | 0.75743 | 31.01667 | 0.24247 |
| 0.33646 | 29.51667 |         | 32.8     |          |         | 29.51667 | 0.74846 | 31.15    | 0.21573 |
| 0.30349 | 29.66667 |         | 32.93333 |          |         | 29.66667 | 0.75088 | 31.28333 | 0.22613 |
| 0.31523 | 29.8     |         | 33.06667 |          |         | 29.8     | 0.81623 | 31.43333 | 0.25547 |
| 0.29152 | 29.93333 |         | 33.2     |          |         | 29.93333 | 0.73556 | 31.56667 | 0.2195  |
| 0.32288 | 30.06667 |         | 33.35    |          |         | 30.06667 | 0.76481 | 31.7     | 0.22432 |
| 0.32495 | 30.2     |         | 33.48333 |          |         | 30.2     | 0.64534 | 31.83333 | 0.21938 |

|         |          |          |          |         |          |         |
|---------|----------|----------|----------|---------|----------|---------|
| 0.36323 | 30.35    | 33.61667 | 30.35    | 0.83287 | 31.96667 | 0.21722 |
| 0.32128 | 30.48333 | 33.75    | 30.48333 | 0.76797 | 32.11667 | 0.22416 |
| 0.29372 | 30.61667 | 33.88333 | 30.61667 | 0.75817 | 32.25    | 0.22368 |
| 0.32664 | 30.75    | 34.03333 | 30.75    | 0.77885 | 32.38333 | 0.23171 |
| 0.32316 | 30.88333 | 34.16667 | 30.88333 | 0.78087 | 32.51667 | 0.21926 |
| 0.34237 | 31.03333 | 34.3     | 31.03333 | 0.79042 | 32.65    | 0.22023 |
| 0.33536 | 31.16667 | 34.43333 | 31.16667 | 0.75117 | 32.8     | 0.23384 |
| 0.32894 | 31.3     | 34.56667 | 31.3     | 0.77762 | 32.93333 | 0.22023 |
| 0.29849 | 31.43333 | 34.71667 | 31.43333 | 0.87124 | 33.06667 | 0.22769 |
| 0.30954 | 31.56667 | 34.85    | 31.56667 | 0.78171 | 33.2     | 0.21107 |
| 0.32527 | 31.71667 | 34.98333 | 31.71667 | 0.74935 | 33.33333 | 0.22199 |
| 0.30124 | 31.85    | 35.11667 | 31.85    | 0.75314 | 33.48333 | 0.23211 |
| 0.31284 | 31.98333 | 35.25    | 31.98333 | 0.79732 | 33.61667 | 0.2187  |
| 0.31747 | 32.11667 | 35.4     | 32.11667 | 0.79702 | 33.75    | 0.21698 |
| 0.33471 | 32.25    | 35.53333 | 32.25    | 0.77112 | 33.88333 | 0.21902 |
| 0.31958 | 32.4     | 35.66667 | 32.4     | 0.76619 | 34.01667 | 0.21854 |
| 0.3094  | 32.53333 | 35.8     | 32.53333 | 0.68823 | 34.16667 | 0.21075 |
| 0.31546 | 32.66667 | 35.93333 | 32.66667 | 0.85415 | 34.3     | 0.21364 |
| 0.31069 | 32.8     | 36.08333 | 32.8     | 0.62012 | 34.43333 | 0.22536 |
| 0.29904 | 32.93333 | 36.21667 | 32.93333 | 0.74994 | 34.56667 | 0.21043 |
| 0.31481 | 33.08333 | 36.35    | 33.08333 | 0.7561  | 34.7     | 0.213   |
| 0.3095  | 33.21667 | 36.48333 | 33.21667 | 0.79407 | 34.85    | 0.23781 |
| 0.31105 | 33.35    | 36.61667 | 33.35    | 0.71532 | 34.98333 | 0.20606 |
| 0.30138 | 33.48333 | 36.76667 | 33.48333 | 0.76797 | 35.11667 | 0.22115 |
| 0.30812 | 33.61667 | 36.9     | 33.61667 | 0.76028 | 35.25    | 0.20995 |
| 0.30629 | 33.76667 | 37.03333 | 33.76667 | 0.82834 | 35.38333 | 0.20044 |
| 0.31206 | 33.9     | 37.16667 | 33.9     | 0.74541 | 35.53333 | 0.19847 |
| 0.3072  | 34.03333 | 37.3     | 34.03333 | 0.73812 | 35.66667 | 0.21766 |
| 0.30619 | 34.16667 | 37.45    | 34.16667 | 0.74053 | 35.8     | 0.20859 |
| 0.30702 | 34.3     | 37.58333 | 34.3     | 0.68582 | 35.93333 | 0.21075 |
| 0.30248 | 34.45    | 37.71667 | 34.45    | 0.75418 | 36.06667 | 0.21734 |
| 0.27722 | 34.58333 | 37.85    | 34.58333 | 0.77136 | 36.21667 | 0.20895 |
| 0.28785 | 34.71667 | 37.98333 | 34.71667 | 0.82401 | 36.35    | 0.20409 |
| 0.30885 | 34.85    | 38.13333 | 34.85    | 0.74979 | 36.48333 | 0.20955 |
| 0.31899 | 34.98333 | 38.26667 | 34.98333 | 0.67543 | 36.61667 | 0.20963 |
| 0.31284 | 35.13333 | 38.4     | 35.13333 | 0.73133 | 36.75    | 0.20618 |
| 0.29767 | 35.26667 | 38.53333 | 35.26667 | 0.75777 | 36.9     | 0.20658 |
| 0.28611 | 35.4     | 38.66667 | 35.4     | 0.76393 | 37.03333 | 0.20481 |
| 0.31688 | 35.53333 | 38.81667 | 35.53333 | 0.70227 | 37.16667 | 0.21011 |
| 0.30207 | 35.66667 | 38.95    | 35.66667 | 0.71399 | 37.3     | 0.20569 |
| 0.31179 | 35.81667 | 39.08333 | 35.81667 | 0.81948 | 37.43333 | 0.22119 |
| 0.31165 | 35.95    | 39.21667 | 35.95    | 0.73812 | 37.58333 | 0.20473 |
| 0.28226 | 36.08333 | 39.35    | 36.08333 | 0.70256 | 37.71667 | 0.21196 |
| 0.32371 | 36.21667 | 39.5     | 36.21667 | 0.72148 | 37.85    | 0.20859 |
| 0.30629 | 36.35    | 39.63333 | 36.35    | 0.71862 | 37.98333 | 0.20867 |
| 0.31468 | 36.5     | 39.76667 | 36.5     | 0.58836 | 38.11667 | 0.21621 |
| 0.31133 | 36.63333 | 39.9     | 36.63333 | 0.88665 | 38.26667 | 0.21589 |
| 0.31188 | 36.76667 | 40.03333 | 36.76667 | 0.69661 | 38.4     | 0.20842 |
| 0.30656 | 36.9     | 40.18333 | 36.9     | 0.72143 | 38.53333 | 0.21601 |
| 0.32096 | 37.03333 | 40.31667 | 37.03333 | 0.70542 | 38.66667 | 0.2061  |

|         |          |          |          |         |          |         |
|---------|----------|----------|----------|---------|----------|---------|
| 0.30931 | 37.18333 | 40.45    | 37.18333 | 0.73812 | 38.8     | 0.2116  |
| 0.31215 | 37.31667 | 40.58333 | 37.31667 | 0.79554 | 38.95    | 0.19486 |
| 0.30995 | 37.45    | 40.71667 | 37.45    | 0.68159 | 39.08333 | 0.19181 |
| 0.30408 | 37.58333 | 40.86667 | 37.58333 | 0.64682 | 39.21667 | 0.22906 |
| 0.33013 | 37.71667 | 41       | 37.71667 | 0.707   | 39.35    | 0.19726 |
| 0.30587 | 37.86667 | 41.13333 | 37.86667 | 0.71709 | 39.48333 | 0.20505 |
| 0.31298 | 38       | 41.26667 | 38       | 0.62175 | 39.63333 | 0.20598 |
| 0.29679 | 38.13333 | 41.4     | 38.13333 | 0.67351 | 39.76667 | 0.2122  |
| 0.31005 | 38.26667 | 41.55    | 38.26667 | 0.71468 | 39.9     | 0.22516 |
| 0.2984  | 38.4     | 41.68333 | 38.4     | 0.65282 | 40.03333 | 0.20473 |
| 0.31394 | 38.55    | 41.81667 | 38.55    | 0.85188 | 40.16667 | 0.20706 |
| 0.30592 | 38.68333 | 41.95    | 38.68333 | 0.72098 | 40.31667 | 0.21196 |
| 0.29299 | 38.81667 | 42.08333 | 38.81667 | 0.60328 | 40.45    | 0.21685 |
| 0.30853 | 38.95    | 42.23333 | 38.95    | 0.69523 | 40.58333 | 0.21404 |
| 0.31381 | 39.08333 | 42.36667 | 39.08333 | 0.59841 | 40.71667 | 0.21914 |
| 0.30404 | 39.23333 | 42.5     | 39.23333 | 0.67705 | 40.85    | 0.20666 |
| 0.30977 | 39.36667 | 42.63333 | 39.36667 | 0.61953 | 41       | 0.2063  |
| 0.29125 | 39.5     | 42.76667 | 39.5     | 0.63854 | 41.13333 | 0.19815 |
| 0.28364 | 39.63333 | 42.91667 | 39.63333 | 0.93285 | 41.26667 | 0.20923 |
| 0.29528 | 39.76667 | 43.05    | 39.76667 | 0.51592 | 41.4     | 0.19815 |
| 0.29248 | 39.91667 | 43.18333 | 39.91667 | 0.7002  | 41.53333 | 0.20361 |
| 0.30408 | 40.05    | 43.31667 | 40.05    | 0.64169 | 41.68333 | 0.20578 |
| 0.30353 | 40.18333 | 43.45    | 40.18333 | 0.53049 | 41.81667 | 0.20015 |
| 0.30972 | 40.31667 | 43.6     | 40.31667 | 0.75536 | 41.95    | 0.2016  |
| 0.29336 | 40.45    | 43.73333 | 40.45    | 0.60397 | 42.08333 | 0.19622 |
| 0.2697  | 40.6     | 43.86667 | 40.6     | 0.73797 | 42.21667 | 0.20694 |
| 0.30376 | 40.73333 | 44       | 40.73333 | 0.42313 | 42.36667 | 0.21878 |
| 0.30629 | 40.86667 | 44.13333 | 40.86667 | 0.77919 | 42.5     | 0.1963  |
| 0.30124 | 41       | 44.28333 | 41       | 0.60678 | 42.63333 | 0.19991 |
| 0.28749 | 41.13333 | 44.41667 | 41.13333 | 0.34513 | 42.76667 | 0.19437 |
| 0.3028  | 41.28333 | 44.55    | 41.28333 | 0.85868 | 42.9     | 0.2012  |
| 0.27923 | 41.41667 | 44.68333 | 41.41667 | 0.72763 | 43.05    | 0.19225 |
| 0.29964 | 41.55    | 44.81667 | 41.55    | 0.23747 | 43.18333 | 0.19823 |
| 0.29235 | 41.68333 | 44.96667 | 41.68333 | 0.84307 | 43.31667 | 0.18362 |
| 0.3011  | 41.81667 | 45.1     | 41.81667 | 0.8408  | 43.45    | 0.20204 |
| 0.2885  | 41.96667 | 45.23333 | 41.96667 | 0.33794 | 43.58333 | 0.18851 |
| 0.2686  | 42.1     | 45.36667 | 42.1     | 0.61594 | 43.73333 | 0.19245 |
| 0.32064 | 42.23333 | 45.5     | 42.23333 | 0.86902 | 43.86667 | 0.1792  |
| 0.28478 | 42.36667 | 45.65    | 42.36667 | 0.53015 | 44       | 0.21023 |
| 0.30152 | 42.5     | 45.78333 | 42.5     | 0.81431 | 44.13333 | 0.1617  |
| 0.30514 | 42.65    | 45.91667 | 42.65    | 0.7071  | 44.26667 | 0.19317 |
| 0.29528 | 42.78333 | 46.05    | 42.78333 | 0.52976 | 44.41667 | 0.19164 |
| 0.29115 | 42.91667 | 46.18333 | 42.91667 | 0.88567 | 44.55    | 0.1947  |
| 0.28098 | 43.05    | 46.33333 | 43.05    | 0.46214 | 44.68333 | 0.18313 |
| 0.29583 | 43.18333 | 46.46667 | 43.18333 | 0.73901 | 44.81667 | 0.19883 |
| 0.29111 | 43.33333 | 46.6     | 43.33333 | 0.57034 | 44.95    | 0.1853  |
| 0.30546 | 43.46667 | 46.73333 | 43.46667 | 0.60033 | 45.1     | 0.16499 |
| 0.30519 | 43.6     | 46.86667 | 43.6     | 0.77284 | 45.23333 | 0.19104 |
| 0.28102 | 43.73333 | 47.01667 | 43.73333 | 0.44786 | 45.36667 | 0.18052 |
| 0.29038 | 43.86667 | 47.15    | 43.86667 | 0.7919  | 45.5     | 0.18506 |

|         |          |          |          |         |          |         |
|---------|----------|----------|----------|---------|----------|---------|
| 0.2906  | 44.01667 | 47.28333 | 44.01667 | 0.65617 | 45.63333 | 0.1914  |
| 0.28208 | 44.15    | 47.41667 | 44.15    | 0.36079 | 45.78333 | 0.20634 |
| 0.29391 | 44.28333 | 47.55    | 44.28333 | 0.64066 | 45.91667 | 0.19092 |
| 0.2951  | 44.41667 | 47.7     | 44.41667 | 0.74423 | 46.05    | 0.19233 |
| 0.29982 | 44.55    | 47.83333 | 44.55    | 0.63933 | 46.18333 | 0.18851 |
| 0.28758 | 44.7     | 47.96667 | 44.7     | 0.7266  | 46.31667 | 0.17149 |
| 0.26942 | 44.83333 | 48.1     | 44.83333 | 0.60963 | 46.46667 | 0.20369 |
| 0.30225 | 44.96667 | 48.23333 | 44.96667 | 0.64869 | 46.6     | 0.1951  |
| 0.31188 | 45.1     | 48.38333 | 45.1     | 0.65805 | 46.73333 | 0.18201 |
| 0.28895 | 45.23333 | 48.51667 | 45.23333 | 0.63874 | 46.86667 | 0.1912  |
| 0.28299 | 45.38333 | 48.65    | 45.38333 | 0.58289 | 47       | 0.20192 |
| 0.30463 | 45.51667 | 48.78333 | 45.51667 | 0.61037 | 47.15    | 0.1892  |
| 0.2857  | 45.65    | 48.91667 | 45.65    | 0.7658  | 47.28333 | 0.18065 |
| 0.29358 | 45.78333 | 49.06667 | 45.78333 | 0.75473 | 47.41667 | 0.20449 |
| 0.28593 | 45.91667 | 49.2     | 45.91667 | 0.72505 | 47.55    | 0.21814 |
| 0.29074 | 46.06667 | 49.33333 | 46.06667 | 0.39242 | 47.68333 | 0.21051 |
| 0.29762 | 46.2     | 49.46667 | 46.2     | 0.79201 | 47.83333 | 0.19225 |
| 0.28171 | 46.33333 | 49.6     | 46.33333 | 0.47777 | 47.96667 | 0.1951  |
| 0.28762 | 46.46667 | 49.75    | 46.46667 | 0.56775 | 48.1     | 0.17968 |
| 0.29262 | 46.6     | 49.88333 | 46.6     | 0.58769 | 48.23333 | 0.18851 |
| 0.30849 | 46.75    | 50.01667 | 46.75    | 0.56176 | 48.36667 | 0.20168 |
| 0.29803 | 46.88333 | 50.15    | 46.88333 | 0.6657  | 48.51667 | 0.18113 |
| 0.27474 | 47.01667 | 50.28333 | 47.01667 | 0.61018 | 48.65    | 0.19618 |
| 0.27758 | 47.15    | 50.43333 | 47.15    | 0.62391 | 48.78333 | 0.19594 |
| 0.3011  | 47.28333 | 50.56667 | 47.28333 | 0.61292 | 48.91667 | 0.19245 |
| 0.28538 | 47.43333 | 50.7     | 47.43333 | 0.53395 | 49.05    | 0.18418 |
| 0.29565 | 47.56667 | 50.83333 | 47.56667 | 0.55114 | 49.2     | 0.18313 |
| 0.27905 | 47.7     | 50.96667 | 47.7     | 0.69153 | 49.33333 | 0.19052 |
| 0.25686 | 47.83333 | 51.11667 | 47.83333 | 0.52487 | 49.46667 | 0.18723 |
| 0.28634 | 47.96667 | 51.25    | 47.96667 | 0.62417 | 49.6     | 0.19582 |
| 0.29051 | 48.11667 | 51.38333 | 48.11667 | 0.63434 | 49.73333 | 0.18189 |
| 0.28483 | 48.25    | 51.51667 | 48.25    | 0.65048 | 49.88333 | 0.19425 |
| 0.28891 | 48.38333 | 51.65    | 48.38333 | 0.64171 | 50.01667 | 0.19743 |
| 0.28767 | 48.51667 | 51.8     | 48.51667 | 0.6429  | 50.15    | 0.19293 |
| 0.29473 | 48.65    | 51.93333 | 48.65    | 0.6619  | 50.28333 | 0.19193 |
| 0.28556 | 48.8     | 52.06667 | 48.8     | 0.5806  | 50.41667 | 0.1898  |
| 0.29235 | 48.93333 | 52.2     | 48.93333 | 0.6657  | 50.56667 | 0.19811 |
| 0.27057 | 49.06667 | 52.33333 | 49.06667 | 0.68122 | 50.7     | 0.19164 |
| 0.28364 | 49.2     | 52.48333 | 49.2     | 0.62044 | 50.83333 | 0.19983 |
| 0.28364 | 49.33333 | 52.61667 | 49.33333 | 0.65982 | 50.96667 | 0.18711 |
| 0.2641  | 49.48333 | 52.75    | 49.48333 | 0.59978 | 51.1     | 0.19124 |
| 0.26594 | 49.61667 | 52.88333 | 49.61667 | 0.59571 | 51.25    | 0.19032 |
| 0.25741 | 49.75    | 53.01667 | 49.75    | 0.64324 | 51.38333 | 0.19381 |
| 0.28547 | 49.88333 | 53.16667 | 49.88333 | 0.6198  | 51.51667 | 0.18289 |
| 0.28281 | 50.01667 | 53.3     | 50.01667 | 0.62863 | 51.65    | 0.18743 |
| 0.29079 | 50.16667 | 53.43333 | 50.16667 | 0.56692 | 51.78333 | 0.2006  |
| 0.26291 | 50.3     | 53.56667 | 50.3     | 0.64761 | 51.93333 | 0.16547 |
| 0.25943 | 50.43333 | 53.7     | 50.43333 | 0.59625 | 52.06667 | 0.20212 |
| 0.27992 | 50.56667 | 53.85    | 50.56667 | 0.56621 | 52.2     | 0.18871 |
| 0.26818 | 50.7     | 53.98333 | 50.7     | 0.58565 | 52.33333 | 0.19068 |

|         |          |          |          |         |          |         |
|---------|----------|----------|----------|---------|----------|---------|
| 0.26438 | 50.85    | 54.11667 | 50.85    | 0.74979 | 52.46667 | 0.18213 |
| 0.27566 | 50.98333 | 54.25    | 50.98333 | 0.72029 | 52.61667 | 0.19775 |
| 0.27139 | 51.11667 | 54.38333 | 51.11667 | 0.38984 | 52.75    | 0.1857  |
| 0.2862  | 51.25    | 54.53333 | 51.25    | 0.78683 | 52.88333 | 0.18835 |
| 0.268   | 51.38333 | 54.66667 | 51.38333 | 0.47465 | 53.01667 | 0.21196 |
| 0.27502 | 51.53333 | 54.8     | 51.53333 | 0.56403 | 53.15    | 0.19353 |
| 0.27281 | 51.66667 | 54.93333 | 51.66667 | 0.58383 | 53.3     | 0.18542 |
| 0.27272 | 51.8     | 55.06667 | 51.8     | 0.55807 | 53.43333 | 0.20192 |
| 0.26053 | 51.93333 | 55.21667 | 51.93333 | 0.66134 | 53.56667 | 0.18069 |
| 0.27309 | 52.06667 | 55.35    | 52.06667 | 0.60619 | 53.7     | 0.18498 |
| 0.27327 | 52.21667 | 55.48333 | 52.21667 | 0.61983 | 53.83333 | 0.18362 |
| 0.27868 | 52.35    | 55.61667 | 52.35    | 0.6089  | 53.98333 | 0.18731 |
| 0.3028  | 52.48333 | 55.75    | 52.48333 | 0.53044 | 54.11667 | 0.18875 |
| 0.26007 | 52.61667 | 55.9     | 52.61667 | 0.54753 | 54.25    | 0.17952 |
| 0.27712 | 52.75    | 56.03333 | 52.75    | 0.687   |          | 0.16647 |
| 0.2686  | 52.9     | 56.16667 | 52.9     | 0.52143 |          | 0.18177 |
| 0.28506 | 53.03333 | 56.3     | 53.03333 | 0.62008 |          | 0.18631 |
| 0.26163 | 53.16667 | 56.43333 | 53.16667 | 0.63017 |          | 0.18434 |
| 0.28666 | 53.3     | 56.58333 | 53.3     | 0.64623 |          | 0.18193 |
| 0.28648 | 53.43333 | 56.71667 | 53.43333 | 0.63751 |          | 0.17707 |
| 0.27657 | 53.58333 | 56.85    | 53.58333 | 0.63869 |          | 0.18775 |
| 0.29831 | 53.71667 | 56.98333 | 53.71667 | 0.65755 |          | 0.17037 |
| 0.25521 | 53.85    | 57.11667 | 53.85    | 0.57679 |          | 0.17149 |
| 0.26406 | 53.98333 | 57.26667 | 53.98333 | 0.66134 |          | 0.18309 |
| 0.26704 | 54.11667 | 57.4     | 54.11667 | 0.67676 |          | 0.15447 |
| 0.29262 | 54.26667 | 57.53333 | 54.26667 | 0.61638 |          | 0.17651 |
| 0.28148 | 54.4     | 57.66667 | 54.4     | 0.65548 |          | 0.18386 |
| 0.27612 | 54.53333 | 57.8     | 54.53333 | 0.59585 |          | 0.19064 |
| 0.27052 | 54.66667 | 57.95    | 54.66667 | 0.59181 |          | 0.17322 |
| 0.28111 | 54.8     | 58.08333 | 54.8     | 0.63904 |          | 0.17824 |
| 0.26204 | 54.95    | 58.21667 | 54.95    | 0.61574 |          | 0.18273 |
| 0.2686  | 55.08333 | 58.35    | 55.08333 | 0.62451 |          | 0.18867 |
| 0.28198 | 55.21667 | 58.48333 | 55.21667 | 0.56319 |          | 0.18265 |
| 0.31105 |          | 58.63333 |          | 0.64337 |          | 0.18249 |
| 0.26121 |          | 58.76667 |          | 0.59235 |          | 0.17209 |
| 0.27699 |          | 58.9     |          | 0.5625  |          | 0.1841  |
| 0.27254 |          | 59.03333 |          | 0.58181 |          | 0.17478 |
| 0.26965 |          | 59.16667 |          | 0.64041 |          | 0.18097 |
| 0.27502 |          | 59.31667 |          | 0.51936 |          | 0.17731 |
| 0.27226 |          | 59.45    |          | 0.55881 |          | 0.17559 |
| 0.25759 |          | 59.58333 |          | 0.69597 |          | 0.17454 |
| 0.26144 |          | 59.71667 |          | 0.64066 |          | 0.17567 |
| 0.28455 |          | 59.85    |          | 0.57334 |          | 0.17209 |
| 0.27951 |          | 60       |          | 0.59954 |          | 0.16282 |
| 0.26676 |          | 60.13333 |          | 0.55669 |          | 0.17759 |
| 0.25837 |          | 60.26667 |          | 0.57053 |          | 0.17759 |
| 0.2553  |          | 60.4     |          | 0.60574 |          | 0.18699 |
| 0.28033 |          | 60.53333 |          | 0.5757  |          | 0.1676  |
| 0.27153 |          | 60.68333 |          | 0.64293 |          | 0.17876 |
| 0.25374 |          | 60.81667 |          | 0.5826  |          | 0.1735  |



|         |          |         |
|---------|----------|---------|
| 0.26456 | 60.95    | 0.61574 |
| 0.26947 | 61.08333 | 0.50203 |
| 0.27359 | 61.21667 | 0.54926 |
| 0.26584 | 61.36667 | 0.61815 |
| 0.25324 | 61.5     | 0.68641 |
| 0.26621 | 61.63333 | 0.51355 |
| 0.24796 | 61.76667 | 0.55802 |
| 0.26062 | 61.9     | 0.58605 |
| 0.26695 | 62.05    | 0.57674 |
| 0.257   | 62.18333 |         |
| 0.26667 | 62.31667 |         |
| 0.2542  | 62.45    |         |
| 0.25635 | 62.58333 |         |
| 0.27126 | 62.73333 |         |
| 0.25686 | 62.86667 |         |
| 0.25901 | 63       |         |
| 0.27103 | 63.13333 |         |
| 0.22953 | 63.26667 |         |
| 0.27043 | 63.41667 |         |
| 0.27639 | 63.55    |         |
| 0.26818 | 63.68333 |         |
| 0.26163 | 63.81667 |         |
| 0.25759 | 63.95    |         |
| 0.25998 | 64.1     |         |
| 0.2763  | 64.23333 |         |
| 0.22788 | 64.36667 |         |
| 0.27598 | 64.5     |         |
| 0.263   | 64.63333 |         |
| 0.25933 | 64.78333 |         |
| 0.26131 | 64.91667 |         |
| 0.2592  | 65.05    |         |
| 0.25493 | 65.18333 |         |
| 0.26841 | 65.31667 |         |
| 0.25658 | 65.46667 |         |
| 0.24737 | 65.6     |         |
| 0.25755 | 65.73333 |         |
| 0.25805 | 65.86667 |         |
| 0.26355 | 66       |         |
| 0.2475  | 66.15    |         |
| 0.28171 | 66.28333 |         |
| 0.25282 | 66.41667 |         |
| 0.2774  | 66.55    |         |
| 0.26346 | 66.68333 |         |
| 0.2824  | 66.83333 |         |
| 0.24595 | 66.96667 |         |
| 0.24361 | 67.1     |         |
| 0.25301 | 67.23333 |         |
| 0.28253 | 67.36667 |         |
| 0.26309 | 67.51667 |         |
| 0.24081 | 67.65    |         |

|         |          |
|---------|----------|
| 0.24879 | 67.78333 |
| 0.26525 | 67.91667 |
| 0.2658  | 68.05    |
| 0.26236 | 68.2     |
| 0.24122 | 68.33333 |
| 0.25654 |          |
| 0.25016 |          |
| 0.25342 |          |
| 0.24714 |          |
| 0.25081 |          |
| 0.26094 |          |
| 0.24769 |          |
| 0.26594 |          |
| 0.26273 |          |
| 0.2586  |          |
| 0.25521 |          |
| 0.26071 |          |
| 0.24595 |          |
| 0.26048 |          |
| 0.27639 |          |
| 0.26098 |          |
| 0.24177 |          |
| 0.24512 |          |
| 0.26511 |          |
| 0.25686 |          |
| 0.24989 |          |
| 0.22935 |          |
| 0.26662 |          |
| 0.25493 |          |
| 0.24512 |          |
| 0.24443 |          |
| 0.24237 |          |
| 0.25246 |          |
| 0.25273 |          |
| 0.25645 |          |
| 0.2486  |          |
| 0.29005 |          |
| 0.24957 |          |
| 0.2486  |          |
| 0.24402 |          |
| 0.24677 |          |
| 0.26621 |          |
| 0.24008 |          |
| 0.24209 |          |
| 0.24429 |          |
| 0.247   |          |
| 0.23751 |          |
| 0.25658 |          |
| 0.24517 |          |
| 0.24599 |          |

0.24659

0.25823

0.24159

0.25713

0.25612

0.1332



| NO       | 6 NO            |          | 7 NO            |          | 8 NO            |          | 9 NO            |          | 10              |
|----------|-----------------|----------|-----------------|----------|-----------------|----------|-----------------|----------|-----------------|
| t        | H=0.030T=60,pre | t        | H=0T=70,pre     | t        | H=0.030T=80     | t        | H=0.030T=60     | t        | H=0.030T=50     |
| min      | KgPP/(min-gcat) |          | KgPP/(min-gcat) |          | KgPP/(min-gcat) |          | KgPP/(min-gcat) |          | KgPP/(min-gcat) |
|          | 0               | 0        | 0               | 0.234538 | 0               | 0        | 0               | 0        | 0               |
| 3.06667  | 0.39443         | 0.55     | 0.270462        | 4.91667  | 1.04138         | 5.05     | 0.4461          | 4.1      | 1.05299         |
| 3.41667  | 0.48632         | 1.1      | 0.318173        | 5.05     | 1.26006         | 5.18333  | 0.45393         | 4.38333  | -0.10245        |
| 3.75     | 0.63573         | 1.65     | 0.337447        | 5.18333  | 0.94031         | 5.33333  | 0.48301         | 4.51667  | 0.65294         |
| 4.1      | 0.79524         | 2.2      | 0.334518        | 5.31667  | 0.46812         | 5.46667  | 0.56585         | 4.65     | 0.17278         |
| 4.43333  | 0.92394         | 2.733333 | 0.343482        | 5.46667  | 0.1753          | 5.6      | 0.49866         | 4.78333  | 0.29024         |
| 4.78333  | 1.0282          | 3.283333 | 0.339959        | 5.6      | 0.48967         | 5.73333  | 0.58941         | 4.91667  | 0.17725         |
| 5.11667  | 1.16569         | 3.833333 | 0.344806        | 5.73333  | 0.76478         | 5.86667  | 0.62748         | 5.06667  | -0.06411        |
| 5.46667  | 1.25552         | 4.383333 | 0.311515        | 5.86667  | 0.47323         | 6.01667  | 0.55648         | 5.2      | 0.16906         |
| 5.8      | 1.27117         | 4.933333 | 0.307587        | 6        | 0.72778         | 6.15     | 0.57753         | 5.33333  | -0.00388        |
| 6.15     | 1.32062         | 5.466667 | 0.323495        | 6.15     | 0.80301         | 6.28333  | 0.65117         | 5.46667  | 0.11635         |
| 6.48333  | 1.31867         | 6.016667 | 0.305455        | 6.28333  | 0.57471         | 6.41667  | 0.6114          | 5.6      | -0.07283        |
| 6.83333  | 1.35047         | 6.566667 | 0.284855        | 6.41667  | 0.81688         | 6.55     | 0.61191         | 5.75     | 0.05481         |
| 7.16667  | 1.32366         | 7.116667 | 0.289359        | 6.55     | 0.82406         | 6.7      | 0.72481         | 5.88333  | -0.04047        |
| 7.51667  | 1.3197          | 7.666667 | 0.300431        | 6.68333  | 0.77278         | 6.83333  | 0.65605         | 6.01667  | 0.02099         |
| 7.85     | 1.29137         | 8.2      | 0.262622        | 6.83333  | 0.95599         | 6.96667  | 0.67901         | 6.15     | 0.01917         |
| 8.2      | 1.27147         | 8.75     | 0.26293         | 6.96667  | 0.97524         | 7.1      | 0.61661         | 6.28333  | 0.02257         |
| 8.53333  | 1.24956         | 9.3      | 0.235753        | 7.1      | 0.96363         | 7.23333  | 0.67662         | 6.43333  | 0.02075         |
| 8.88333  | 1.15588         | 9.85     | 0.253308        | 7.23333  | 1.01125         | 7.38333  | 0.65592         | 6.56667  | 0.01303         |
| 9.21667  | 1.1651          | 10.4     | 0.230445        | 7.36667  | 1.037           | 7.51667  | 0.78589         | 6.7      | -0.01065        |
| 9.56667  | 1.12971         | 10.93333 | 0.252403        | 7.51667  | 1.00397         | 7.65     | 0.65776         | 6.83333  | 0.07722         |
| 9.9      | 1.02984         | 11.48333 | 0.221126        | 7.65     | 0.92048         | 7.78333  | 0.63513         | 6.96667  | -0.00447        |
| 10.25    | 0.98663         | 12.03333 | 0.245818        | 7.78333  | 1.09655         | 7.91667  | 0.65647         | 7.11667  | 0.05164         |
| 10.58333 | 0.96405         | 12.58333 | 0.229721        | 7.91667  | 0.92748         | 8.06667  | 0.69723         | 7.25     | -0.08174        |
| 10.93333 | 0.90103         | 13.13333 | 0.225358        | 8.05     | 0.97022         | 8.2      | 0.68329         | 7.38333  | 0.08094         |
| 11.26667 | 0.85554         | 13.66667 | 0.23324         | 8.2      | 0.9976          | 8.33333  | 0.62705         | 7.51667  | -0.02265        |
| 11.61667 | 0.84827         | 14.21667 | 0.20427         | 8.33333  | 0.94085         | 8.46667  | 0.6247          | 7.65     | 0.12866         |
| 11.95    | 0.79395         | 14.76667 | 0.208265        | 8.46667  | 0.91664         | 8.6      | 0.65617         | 7.8      | 0.16015         |
| 12.3     | 0.78637         | 15.31667 | 0.207343        | 8.6      | 0.96534         | 8.75     | 0.75099         | 7.93333  | 0.09647         |
| 12.63333 | 0.71175         | 15.86667 | 0.205658        | 8.73333  | 0.96064         | 8.88333  | 0.72704         | 8.06667  | 0.16617         |
| 12.98333 | 0.68343         | 16.4     | 0.200133        | 8.88333  | 1.03736         | 9.01667  | 0.6699          | 8.2      | 0.11904         |
| 13.31667 | 0.67278         | 16.95    | 0.199623        | 9.01667  | 0.84579         | 9.15     | 0.60233         | 8.33333  | 0.23436         |
| 13.66667 | 0.6327          | 17.5     | 0.215833        | 9.15     | 0.74111         | 9.28333  | 0.71194         | 8.48333  | 0.16375         |
| 14       | 0.56086         | 18.05    | 0.201638        | 9.28333  | 0.96308         | 9.43333  | 0.60857         | 8.61667  | 0.19761         |
| 14.35    | 0.57927         | 18.6     | 0.190382        | 9.41667  | 0.69109         | 9.56667  | 0.66622         | 8.75     | 0.19697         |
| 14.68333 | 0.53895         | 19.13333 | 0.181575        | 9.56667  | 0.72376         | 9.7      | 0.66297         | 8.88333  | 0.19151         |
| 15.03333 | 0.54121         | 19.68333 | 0.204823        | 9.7      | 0.77495         | 9.83333  | 0.63774         | 9.01667  | 0.20438         |
| 15.36667 | 0.46787         | 20.23333 | 0.163416        | 9.83333  | 0.6938          | 9.96667  | 0.60973         | 9.16667  | 0.19895         |
| 15.71667 | 0.43611         | 20.78333 | 0.176851        | 9.96667  | 0.66267         | 10.11667 | 0.58407         | 9.3      | 0.26473         |
| 16.05    | 0.37781         | 21.33333 | 0.187684        | 10.1     | 0.55293         | 10.25    | 0.70104         | 9.43333  | 0.24188         |
| 16.4     | 0.42211         | 21.86667 | 0.197145        | 10.25    | 0.60096         | 10.38333 | 0.64933         | 9.56667  | 0.23281         |
| 16.73333 | 0.42429         | 22.41667 | 0.202638        | 10.38333 | 0.58925         | 10.51667 | 0.59728         | 9.7      | 0.25131         |
| 17.08333 | 0.3153          | 22.96667 | 0.177114        | 10.51667 | 0.48561         | 10.65    | 0.54173         | 9.85     | 0.29804         |
| 17.41667 | 0.34662         | 23.51667 | 0.198951        | 10.65    | 0.4801          | 10.8     | 0.61302         | 9.98333  | 0.29115         |
| 17.76667 | 0.33781         | 24.06667 | 0.202045        | 10.78333 | 0.45805         | 10.93333 | 0.5836          | 10.11667 | 0.26849         |
| 18.1     | 0.33659         | 24.6     | 0.199436        | 10.93333 | 0.54312         | 11.06667 | 0.53147         | 10.25    | 0.41906         |
| 18.45    | 0.33432         | 25.15    | 0.186631        | 11.06667 | 0.43523         | 11.2     | 0.55948         | 10.38333 | 0.28901         |

|          |         |          |          |          |          |          |         |          |         |
|----------|---------|----------|----------|----------|----------|----------|---------|----------|---------|
| 18.78333 | 0.33815 | 25.7     | 0.185429 | 11.2     | 0.41269  | 11.33333 | 0.57941 | 10.53333 | 0.3155  |
| 19.13333 | 0.31688 | 26.25    | 0.184909 | 11.33333 | 0.34568  | 11.48333 | 0.59331 | 10.66667 | 0.2978  |
| 19.46667 | 0.29339 | 26.8     | 0.188633 | 11.46667 | 0.40844  | 11.61667 | 0.58586 | 10.8     | 0.3195  |
| 19.81667 | 0.33441 | 27.33333 | 0.15662  | 11.61667 | 0.45723  | 11.75    | 0.51038 | 10.93333 | 0.29772 |
| 20.15    | 0.28939 | 27.88333 | 0.17793  | 11.75    | 0.33037  | 11.88333 | 0.52539 | 11.06667 | 0.26818 |
| 20.5     | 0.33377 | 28.43333 | 0.197192 | 11.88333 | 0.3666   | 12.01667 | 0.49695 | 11.21667 | 0.29324 |
| 20.83333 | 0.29091 | 28.98333 | 0.189999 | 12.01667 | 0.35404  | 12.16667 | 0.6179  | 11.35    | 0.28164 |
| 21.18333 | 0.36104 | 29.53333 | 0.177974 | 12.15    | 0.29616  | 12.3     | 0.47433 | 11.48333 | 0.30758 |
| 21.51667 | 0.39049 | 30.06667 | 0.164932 | 12.3     | 0.27597  | 12.43333 | 0.52937 | 11.61667 | 0.32481 |
| 21.86667 | 0.32153 | 30.61667 | 0.14006  | 12.43333 | 0.28279  | 12.56667 | 0.46056 | 11.75    | 0.36362 |
| 22.2     | 0.30847 | 31.16667 | 0.167064 | 12.56667 | 0.22916  | 12.7     | 0.56025 | 11.9     | 0.37328 |
| 22.55    | 0.32897 | 31.71667 | 0.186332 | 12.7     | 0.36154  | 12.85    | 0.49422 | 12.03333 | 0.28588 |
| 22.88333 | 0.36686 | 32.26667 | 0.194648 | 12.83333 | 0.14255  | 12.98333 | 0.53993 | 12.16667 | 0.32045 |
| 23.23333 | 0.31834 | 32.8     | 0.183634 | 12.98333 | 0.25753  | 13.11667 | 0.44948 | 12.3     | 0.36362 |
| 23.56667 | 0.34318 | 33.35    | 0.177779 | 13.11667 | 0.33814  | 13.25    | 0.47839 | 12.43333 | 0.30109 |
| 23.91667 | 0.33634 | 33.9     | 0.183645 | 13.25    | 0.25713  | 13.38333 | 0.47039 | 12.58333 | 0.43545 |
| 24.25    | 0.31627 | 34.45    | 0.181553 | 13.38333 | 0.12687  | 13.53333 | 0.46736 | 12.71667 | 0.35653 |
| 24.6     | 0.36302 | 35       | 0.165767 | 13.51667 | 0.28609  | 13.66667 | 0.48335 | 12.85    | 0.36655 |
| 24.93333 | 0.37307 | 35.55    | 0.144156 | 13.66667 | 0.23399  | 13.8     | 0.39581 | 12.98333 | 0.3688  |
| 25.28333 | 0.32416 | 36.08333 | 0.16208  | 13.8     | 0.20128  | 13.93333 | 0.39038 | 13.11667 | 0.31594 |
| 25.61667 | 0.37629 | 36.63333 | 0.148737 | 13.93333 | 0.15109  | 14.06667 | 0.45076 | 13.26667 | 0.28885 |
| 25.96667 | 0.36633 | 37.18333 | 0.179989 | 14.06667 | 0.21448  | 14.21667 | 0.39842 | 13.4     | 0.35882 |
| 26.3     | 0.38533 | 37.73333 | 0.18163  | 14.2     | 0.15768  | 14.35    | 0.39192 | 13.53333 | 0.28362 |
| 26.65    | 0.38973 | 38.28333 | 0.173635 | 14.35    | 0.2288   | 14.48333 | 0.39709 | 13.66667 | 0.27348 |
| 26.98333 | 0.39005 | 38.81667 | 0.164495 | 14.48333 | 0.14932  | 14.61667 | 0.34906 | 13.8     | 0.34651 |
| 27.33333 | 0.3292  | 39.36667 | 0.155741 | 14.61667 | 0.16229  | 14.75    | 0.36925 | 13.95    | 0.30841 |
| 27.66667 | 0.36951 | 39.91667 | 0.157494 | 14.75    | 0.17295  | 14.9     | 0.32943 | 14.08333 | 0.41328 |
| 28.01667 | 0.38366 | 40.46667 | 0.1714   | 14.88333 | 0.2105   | 15.03333 | 0.40765 | 14.21667 | 0.34663 |
| 28.35    | 0.37728 | 41.01667 | 0.154064 | 15.03333 | 0.02539  | 15.16667 | 0.36925 | 14.35    | 0.22042 |
| 28.7     | 0.33126 | 41.55    | 0.166676 | 15.16667 | 0.32287  | 15.3     | 0.32631 | 14.48333 | 0.35819 |
| 29.03333 | 0.38434 | 42.1     | 0.153806 | 15.3     | 0.08354  | 15.43333 | 0.41732 | 14.63333 | 0.29911 |
| 29.38333 | 0.40496 | 42.65    | 0.1701   | 15.43333 | 0.34058  | 15.58333 | 0.27294 | 14.76667 | 0.36702 |
| 29.71667 | 0.3761  | 43.2     | 0.192697 | 15.56667 | 0.18845  | 15.71667 | 0.27598 | 14.9     | 0.25935 |
| 30.06667 | 0.35386 | 43.75    | 0.170084 | 15.71667 | 0.29711  | 15.85    | 0.36668 | 15.03333 | 0.31625 |
| 30.4     | 0.36646 | 44.28333 | 0.162293 | 15.85    | 0.17512  | 15.98333 | 0.29137 | 15.16667 | 0.3431  |
| 30.75    | 0.36416 | 44.83333 | 0.127212 | 15.98333 | 0.2241   | 16.11667 | 0.27876 | 15.31667 | 0.27202 |
| 31.08333 | 0.41353 | 45.38333 | 0.151523 | 16.11667 | 0.02124  | 16.26667 | 0.41091 | 15.45    | 0.27665 |
| 31.43333 | 0.38693 | 45.93333 | 0.158984 | 16.25    | 0.26327  | 16.4     | 0.32541 | 15.58333 | 0.32964 |
| 31.76667 | 0.38133 | 46.48333 | 0.178029 | 16.4     | -0.00931 | 16.53333 | 0.25185 | 15.71667 | 0.31    |
| 32.11667 | 0.36446 | 47.01667 | 0.167777 | 16.53333 | 0.375    | 16.66667 | 0.36745 | 15.85    | 0.30493 |
| 32.45    | 0.40626 | 47.56667 | 0.147152 | 16.66667 | 0.0886   | 16.8     | 0.29218 | 16       | 0.19024 |
| 32.8     | 0.36212 | 48.11667 | 0.146623 | 16.8     | 0.16509  | 16.95    | 0.29103 | 16.13333 | 0.25404 |
| 33.13333 | 0.38903 | 48.66667 | 0.141602 | 16.93333 | 0.19256  | 17.08333 | 0.17269 | 16.26667 | 0.3275  |
| 33.48333 | 0.37428 | 49.21667 | 0.144178 | 17.08333 | 0.13206  | 17.21667 | 0.33127 | 16.4     | 0.24909 |
| 33.81667 | 0.33326 | 49.75    | 0.131683 | 17.21667 | 0.19907  | 17.35    | 0.2962  | 16.53333 | 0.30588 |
| 34.16667 | 0.38769 | 50.3     | 0.135611 | 17.35    | 0.1219   | 17.48333 | 0.25861 | 16.68333 | 0.2639  |
| 34.5     | 0.34038 | 50.85    | 0.170649 | 17.48333 | 0.17444  | 17.63333 | 0.2525  | 16.81667 | 0.21282 |
| 34.85    | 0.35852 | 51.4     | 0.16629  | 17.61667 | 0.14449  | 17.76667 | 0.23932 | 16.95    | 0.27923 |
| 35.18333 | 0.34436 | 51.95    | 0.158416 | 17.76667 | 0.0919   | 17.9     | 0.26066 | 17.08333 | 0.25804 |
| 35.53333 | 0.38137 | 52.48333 | 0.147229 | 17.9     | 0.05779  | 18.03333 | 0.31079 | 17.21667 | 0.28085 |

|          |         |          |          |          |          |          |         |          |         |
|----------|---------|----------|----------|----------|----------|----------|---------|----------|---------|
| 35.86667 | 0.3677  | 53.03333 | 0.163119 | 18.03333 | 0.2325   | 18.16667 | 0.20733 | 17.36667 | 0.28635 |
| 36.21667 | 0.37747 | 53.58333 | 0.153023 | 18.16667 | 0.17029  | 18.31667 | 0.29633 | 17.5     | 0.19317 |
| 36.55    | 0.35601 | 54.13333 | 0.17554  | 18.3     | 0.13279  | 18.45    | 0.23881 | 17.63333 | 0.2245  |
| 36.9     | 0.36235 | 54.68333 | 0.154488 | 18.45    | 0.02783  | 18.58333 | 0.32161 | 17.76667 | 0.19729 |
| 37.23333 | 0.36288 | 55.21667 | 0.161511 | 18.58333 | 0.24059  | 18.71667 | 0.2176  | 17.9     | 0.27166 |
| 37.58333 | 0.36635 | 55.76667 | 0.178794 | 18.71667 | 0.08078  | 18.85    | 0.25408 | 18.05    | 0.246   |
| 37.91667 | 0.35965 | 56.31667 | 0.182543 | 18.85    | 0.16618  | 19       | 0.26772 | 18.18333 | 0.22707 |
| 38.26667 | 0.39013 | 56.86667 | 0.145918 | 18.98333 | 0.11887  | 19.13333 | 0.30159 | 18.31667 | 0.22545 |
| 38.6     | 0.35881 | 57.41667 | 0.156556 | 19.13333 | 0.10735  | 19.26667 | 0.29398 | 18.45    | 0.25376 |
| 38.95    | 0.31292 | 57.95    | 0.154485 | 19.26667 | 0.2461   | 19.4     | 0.23235 | 18.58333 | 0.14494 |
| 39.28333 | 0.32888 | 58.5     | 0.158149 | 19.4     | -0.05033 | 19.53333 | 0.23479 | 18.73333 | 0.21487 |
| 39.63333 | 0.3498  | 59.05    | 0.14833  | 19.53333 | 0.29052  | 19.68333 | 0.27225 | 18.86667 | 0.21404 |
| 39.96667 | 0.34179 | 59.6     | 0.16077  | 19.66667 | 0.18447  | 19.81667 | 0.28141 | 19       | 0.25733 |
| 40.31667 | 0.32909 | 60.15    | 0.128266 | 19.81667 | 0.07911  | 19.95    | 0.24805 | 19.13333 | 0.18256 |
| 40.65    | 0.31445 | 60.68333 | 0.181068 | 19.95    | 0.29991  | 20.08333 | 0.16594 | 19.26667 | 0.24956 |
| 41       | 0.32505 | 61.23333 | 0.147794 | 20.08333 | 0.03786  | 20.21667 | 0.28709 | 19.41667 | 0.16925 |
| 41.33333 | 0.31087 | 61.78333 | 0.158626 | 20.21667 | 0.248    | 20.36667 | 0.24835 | 19.55    | 0.1394  |
| 41.68333 | 0.3098  | 62.33333 | 0.146059 | 20.35    | 0.10184  | 20.5     | 0.38747 | 19.68333 | 0.30358 |
| 42.01667 | 0.33055 | 62.88333 | 0.148814 | 20.5     | 0.1416   | 20.63333 | 0.27307 | 19.81667 | 0.18474 |
| 42.36667 | 0.31888 | 63.41667 | 0.154397 | 20.63333 | 0.1439   | 20.76667 | 0.33854 | 19.95    | 0.1847  |
| 42.7     | 0.30618 | 63.96667 | 0.149464 | 20.76667 | 0.13952  | 20.9     | 0.22696 | 20.1     | 0.16252 |
| 43.05    | 0.28343 | 64.51667 | 0.168786 | 20.9     | 0.13211  | 21.05    | 0.24625 | 20.23333 | 0.14771 |
| 43.38333 | 0.28284 | 65.06667 | 0.150818 | 21.03333 | 0.29187  | 21.18333 | 0.35702 | 20.36667 | 0.20806 |
| 43.73333 | 0.32181 | 65.61667 | 0.156071 | 21.18333 | 0.16094  | 21.31667 | 0.26926 | 20.5     | 0.08902 |
| 44.06667 | 0.29501 | 66.15    | 0.135036 | 21.31667 | 0.16523  | 21.45    | 0.27187 | 20.63333 | 0.16482 |
| 44.41667 | 0.33301 | 66.7     | 0.143154 | 21.45    | 0.25527  | 21.58333 | 0.37549 | 20.78333 | 0.21353 |
| 44.75    | 0.27568 | 67.25    | 0.170546 | 21.58333 | 0.16166  | 21.73333 | 0.25481 | 20.91667 | 0.26596 |
| 45.1     | 0.3146  | 67.8     | 0.139498 | 21.71667 | 0.15673  | 21.86667 | 0.23128 | 21.05    | 0.1786  |
| 45.43333 | 0.31865 | 68.35    | 0.151121 | 21.86667 | 0.2044   | 22       | 0.30989 | 21.18333 | 0.17361 |
| 45.78333 | 0.31884 | 68.88333 | 0.139212 | 22       | 0.15122  | 22.13333 | 0.29218 | 21.31667 | 0.13468 |
| 46.11667 | 0.34224 | 69.43333 | 0.148051 | 22.13333 | 0.22315  | 22.26667 | 0.3276  | 21.46667 | 0.18486 |
| 46.46667 | 0.29742 | 69.98333 | 0.144431 | 22.26667 | 0.18759  | 22.41667 | 0.3193  | 21.6     | 0.23198 |
| 46.8     | 0.3099  | 70.53333 | 0.145466 | 22.4     | 0.17499  | 22.55    | 0.30912 | 21.73333 | 0.18957 |
| 47.15    | 0.29495 | 71.08333 | 0.125736 | 22.55    | 0.15298  | 22.68333 | 0.2909  | 21.86667 | 0.17535 |
| 47.48333 | 0.29977 | 71.61667 | 0.142416 | 22.68333 | 0.15271  | 22.81667 | 0.24728 | 22       | 0.23563 |
| 47.83333 | 0.29621 | 72.16667 | 0.140368 | 22.81667 | 0.17553  | 22.95    | 0.26066 | 22.15    | 0.13833 |
| 48.16667 | 0.25799 | 72.71667 | 0.129918 | 22.95    | 0.19256  | 23.1     | 0.28252 | 22.28333 | 0.19064 |
| 48.51667 | 0.3395  | 73.26667 | 0.11425  | 23.08333 | 0.29119  | 23.23333 | 0.24612 | 22.41667 | 0.2696  |
| 48.85    | 0.27823 | 73.81667 | 0.155377 | 23.23333 | 0.12574  | 23.36667 | 0.29843 | 22.55    | 0.15543 |
| 49.2     | 0.33126 | 74.35    | 0.149376 | 23.36667 | 0.12298  | 23.5     | 0.34248 | 22.68333 | 0.18605 |
| 49.53333 | 0.31338 | 74.9     | 0.142244 | 23.5     | 0.19148  | 23.63333 | 0.30365 | 22.83333 | 0.07793 |
| 49.88333 | 0.27378 | 75.45    | 0.111704 | 23.63333 | 0.26779  | 23.78333 | 0.29907 | 22.96667 | 0.14819 |
| 50.21667 | 0.30169 | 76       | 0.171215 | 23.76667 | 0.02069  | 23.91667 | 0.26926 | 23.1     | 0.16593 |
| 50.56667 | 0.30641 | 76.55    | 0.128387 | 23.91667 | 0.33149  | 24.05    | 0.29295 | 23.23333 | 0.19305 |
| 50.9     | 0.30344 | 77.08333 | 0.133752 | 24.05    | 0.15063  | 24.18333 | 0.22453 | 23.36667 | 0.18834 |
| 51.25    | 0.30255 | 77.63333 | 0.14975  | 24.18333 | 0.19347  | 24.31667 | 0.33256 | 23.51667 | 0.15484 |
| 51.58333 | 0.32821 | 78.18333 | 0.131247 | 24.31667 | 0.23648  | 24.46667 | 0.2392  | 23.65    | 0.11904 |
| 51.93333 | 0.25146 | 78.73333 | 0.126196 | 24.45    | 0.05557  | 24.6     | 0.30211 | 23.78333 | 0.20268 |
| 52.26667 | 0.3416  | 79.28333 | 0.122981 | 24.6     | 0.33014  | 24.73333 | 0.23817 | 23.91667 | 0.22858 |
| 52.61667 | 0.26165 | 79.81667 | 0.145558 | 24.73333 | 0.2058   | 24.86667 | 0.26092 | 24.05    | 0.09801 |

|          |         |          |          |          |          |          |         |          |         |
|----------|---------|----------|----------|----------|----------|----------|---------|----------|---------|
| 52.95    | 0.30544 | 80.36667 | 0.148968 | 24.86667 | 0.20332  | 25       | 0.30886 | 24.2     | 0.16997 |
| 53.3     | 0.28861 | 80.91667 | 0.14931  | 25       | 0.24457  | 25.15    | 0.3237  | 24.33333 | 0.11746 |
| 53.63333 | 0.27953 | 81.46667 | 0.122012 | 25.13333 | 0.1927   | 25.28333 | 0.34415 | 24.46667 | 0.16605 |
| 53.98333 | 0.29314 | 82.01667 | 0.144737 | 25.28333 | 0.14774  | 25.41667 | 0.21358 | 24.6     | 0.11215 |
| 54.31667 | 0.28274 | 82.55    | 0.119831 | 25.41667 | 0.28392  | 25.55    | 0.27187 | 24.73333 | 0.14023 |
| 54.66667 | 0.30515 | 83.1     | 0.123346 | 25.55    | 0.2194   | 25.68333 | 0.31994 | 24.88333 | 0.16617 |
| 55       | 0.31224 | 83.65    | 0.12656  | 25.68333 | 0.15027  | 25.83333 | 0.25284 | 25.01667 | 0.16157 |
| 55.35    | 0.30525 | 84.2     | 0.150279 | 25.81667 | 0.20445  | 25.96667 | 0.26524 | 25.15    | 0.13409 |
| 55.68333 | 0.30919 | 84.75    | 0.131208 | 25.96667 | 0.1285   | 26.1     | 0.31485 | 25.28333 | 0.18066 |
| 56.03333 | 0.3689  | 85.28333 | 0.127242 | 26.1     | 0.18926  | 26.23333 | 0.26109 | 25.41667 | 0.21218 |
| 56.36667 | 0.2828  | 85.83333 | 0.144094 | 26.23333 | 0.24814  | 26.36667 | 0.29236 | 25.56667 | 0.11975 |
| 56.71667 | 0.29948 | 86.38333 | 0.126075 | 26.36667 | 0.24561  | 26.51667 | 0.26798 | 25.7     | 0.17575 |
| 57.05    | 0.29652 | 86.93333 | 0.145558 | 26.5     | 0.16563  | 26.65    | 0.33191 | 25.83333 | 0.0849  |
| 57.4     | 0.28162 | 87.48333 | 0.130479 | 26.65    | 0.1233   | 26.78333 | 0.31006 | 25.96667 | 0.13698 |
|          | 0.28779 | 88.01667 | 0.095374 | 26.78333 | 0.23657  | 26.91667 | 0.21307 | 26.1     | 0.1706  |
|          | 0.3055  | 88.56667 | 0.172666 | 26.91667 | 0.25107  | 27.05    | 0.3098  | 26.25    | 0.11096 |
|          | 0.25137 | 89.11667 | 0.114127 | 27.05    | 0.07938  | 27.2     | 0.30369 | 26.38333 | 0.14122 |
|          | 0.30005 | 89.66667 | 0.159729 | 27.18333 | 0.15822  | 27.33333 | 0.42861 | 26.51667 | 0.23151 |
|          | 0.31808 | 90.21667 | 0.132098 | 27.33333 | 0.32856  | 27.46667 | 0.29052 | 26.65    | 0.18046 |
|          | 0.26308 | 90.76667 | 0.133868 | 27.46667 | 0.12081  | 27.6     | 0.32811 | 26.78333 | 0.14652 |
|          | 0.29148 | 91.3     | 0.115316 | 27.6     | 0.36588  | 27.73333 | 0.30544 | 26.93333 | 0.07405 |
|          | 0.28023 | 91.85    | 0.146342 | 27.73333 | 0.14463  | 27.88333 | 0.34312 | 27.06667 | 0.16347 |
|          | 0.17869 | 92.4     | 0.143408 | 27.86667 | 0.27018  | 28.01667 | 0.33726 | 27.2     | 0.163   |
|          |         | 92.95    | 0.142207 | 28.01667 | 0.1608   | 28.15    | 0.30963 | 27.33333 | 0.26137 |
|          |         | 93.5     | 0.144633 | 28.15    | 0.28555  | 28.28333 | 0.33397 | 27.46667 | 0.13975 |
|          |         | 94.03333 | 0.128233 | 28.28333 | 0.00696  | 28.41667 | 0.28594 | 27.61667 | 0.1192  |
|          |         | 94.58333 | 0.149618 | 28.41667 | 0.23413  | 28.56667 | 0.28376 | 27.75    | 0.20038 |
|          |         | 95.13333 | 0.128773 | 28.55    | 0.15434  | 28.7     | 0.30091 | 27.88333 | 0.21163 |
|          |         | 95.68333 | 0.121007 | 28.7     | 0.11169  | 28.83333 | 0.28363 | 28.01667 | 0.14969 |
|          |         | 96.23333 | 0.11612  | 28.83333 | 0.30276  | 28.96667 | 0.28786 | 28.15    | 0.21305 |
|          |         | 96.76667 | 0.138942 | 28.96667 | 0.15764  | 29.1     | 0.32969 | 28.3     | 0.12573 |
|          |         | 97.31667 | 0.148495 | 29.1     | 0.34528  | 29.25    | 0.34196 | 28.43333 | 0.17583 |
|          |         | 97.86667 | 0.138992 | 29.23333 | 0.18804  | 29.38333 | 0.30561 | 28.56667 | 0.14724 |
|          |         | 98.41667 | 0.136013 | 29.38333 | 0.12958  | 29.51667 | 0.298   | 28.7     | 0.18533 |
|          |         | 98.96667 | 0.134356 | 29.51667 | 0.20801  | 29.65    | 0.30899 | 28.83333 | 0.03065 |
|          |         | 99.5     | 0.107775 | 29.65    | 0.14155  | 29.78333 | 0.319   | 28.98333 | 0.21499 |
|          |         | 100.05   | 0.141679 | 29.78333 | 0.41431  | 29.93333 | 0.35933 | 29.11667 | 0.15361 |
|          |         | 100.6    | 0.117411 | 29.91667 | 0.12136  | 30.06667 | 0.28436 | 29.25    | 0.06297 |
|          |         | 101.15   | 0.134268 | 30.06667 | 0.26838  | 30.2     | 0.31237 | 29.38333 | 0.16581 |
|          |         | 101.7    | 0.131052 | 30.2     | 0.01898  | 30.33333 | 0.34795 | 29.51667 | 0.20763 |
|          |         | 102.2333 | 0.154243 | 30.33333 | 0.31487  | 30.46667 | 0.26772 | 29.66667 | 0.18763 |
|          |         | 102.7833 | 0.154243 | 30.46667 | 0.15723  | 30.61667 | 0.29137 | 29.8     | 0.1689  |
|          |         | 103.3333 | 0.14069  | 30.6     | 0.27624  | 30.75    | 0.26507 | 29.93333 | 0.19824 |
|          |         | 103.8833 | 0.156093 | 30.75    | 0.1575   | 30.88333 | 0.29428 | 30.06667 | 0.13385 |
|          |         | 104.4333 | 0.122883 | 30.88333 | 0.31446  | 31.01667 | 0.23595 | 30.2     | 0.14134 |
|          |         | 104.9667 | 0.106815 | 31.01667 | -0.01401 | 31.15    | 0.27713 | 30.35    | 0.21899 |
|          |         | 105.5167 | 0.123423 | 31.15    | 0.35576  | 31.3     | 0.28188 | 30.48333 | 0.1095  |
|          |         | 106.0667 | 0.144553 | 31.28333 | 0.1285   | 31.43333 | 0.34376 | 30.61667 | 0.12969 |
|          |         | 106.6167 | 0.103523 | 31.43333 | 0.1922   | 31.56667 | 0.24989 | 30.75    | 0.22232 |
|          |         | 107.1667 | 0.130669 | 31.56667 | 0.22848  | 31.7     | 0.25652 | 30.88333 | 0.15266 |



|          |          |          |         |          |         |          |         |
|----------|----------|----------|---------|----------|---------|----------|---------|
| 107.7    | 0.135523 | 31.7     | 0.15325 | 31.83333 | 0.29278 | 31.03333 | 0.19159 |
| 108.25   | 0.105899 | 31.83333 | 0.23896 | 31.98333 | 0.33555 | 31.16667 | 0.21852 |
| 108.8    | 0.124666 | 31.96667 | 0.23783 | 32.11667 | 0.28945 | 31.3     | 0.19377 |
| 109.35   | 0.171728 | 32.11667 | 0.25076 | 32.25    | 0.24326 | 31.43333 | 0.12688 |
| 109.9    | 0.133078 | 32.25    | 0.14612 | 32.38333 | 0.29167 | 31.56667 | 0.16173 |
| 110.4333 | 0.124027 | 32.38333 | 0.09506 | 32.51667 | 0.34389 | 31.71667 | 0.16197 |
| 110.9833 | 0.135859 | 32.51667 | 0.29711 | 32.66667 | 0.22632 | 31.85    | 0.13987 |
| 111.5333 | 0.125954 | 32.65    | 0.12881 | 32.8     | 0.33037 | 31.98333 | 0.12866 |
| 112.0833 | 0.100246 | 32.8     | 0.28555 | 32.93333 | 0.23565 | 32.11667 | 0.19761 |
| 112.6333 | 0.119335 | 32.93333 | 0.23097 | 33.06667 | 0.28568 | 32.25    | 0.21971 |
| 113.1667 | 0.13961  | 33.06667 | 0.18524 | 33.2     | 0.24309 | 32.4     | 0.187   |
| 113.7167 | 0.144718 | 33.2     | 0.35521 | 33.35    | 0.32109 | 32.53333 | 0.14435 |
| 114.2667 | 0.137195 | 33.33333 | 0.0731  | 33.48333 | 0.26588 | 32.66667 | 0.06059 |
| 114.8167 | 0.129599 | 33.48333 | 0.24145 | 33.61667 | 0.27944 | 32.8     | 0.14625 |
| 115.3667 | 0.120381 | 33.61667 | 0.21669 | 33.75    | 0.19536 | 32.93333 | 0.14205 |
| 115.9    | 0.111539 | 33.75    | 0.15438 | 33.88333 | 0.25977 | 33.08333 | 0.15745 |
| 116.45   | 0.102818 | 33.88333 | 0.1824  | 34.03333 | 0.29586 | 33.21667 | 0.17448 |
| 117      | 0.132184 | 34.01667 | 0.1772  | 34.16667 | 0.22863 | 33.35    | 0.13963 |
| 117.55   | 0.1257   | 34.16667 | 0.2447  | 34.3     | 0.26037 | 33.48333 | 0.20402 |
| 118.1    | 0.114584 | 34.3     | 0.21804 | 34.43333 | 0.3432  | 33.61667 | 0.17504 |
| 118.6333 | 0.113808 | 34.43333 | 0.14828 | 34.56667 | 0.28671 | 33.76667 | 0.12466 |
| 119.1833 | 0.121033 | 34.56667 | 0.22432 | 34.71667 | 0.33204 | 33.9     | 0.1529  |
| 119.7333 | 0.143848 | 34.7     | 0.26305 | 34.85    | 0.26276 | 34.03333 | 0.17809 |
| 120.2833 | 0.159331 | 34.85    | 0.12601 | 34.98333 | 0.26002 | 34.16667 | 0.05528 |
| 120.8333 | 0.159331 | 34.98333 | 0.19532 | 35.11667 | 0.30172 | 34.3     | 0.17967 |
| 121.3667 | 0.159331 | 35.11667 | 0.25473 | 35.25    | 0.22658 | 34.45    | 0.15793 |
| 121.9167 | 0.159331 | 35.25    | 0.14955 | 35.4     | 0.27709 | 34.58333 | 0.16181 |
| 122.4667 | 0.159331 | 35.38333 | 0.21655 | 35.53333 | 0.22803 | 34.71667 | 0.15627 |
| 123.0167 | 0.159331 | 35.53333 | 0.15353 | 35.66667 | 0.29475 | 34.85    | 0.11156 |
| 123.5667 | 0.159331 | 35.66667 | 0.23137 | 35.8     | 0.23684 | 34.98333 | 0.14763 |
| 124.1    | 0.159331 | 35.8     | 0.17914 | 35.93333 | 0.29223 | 35.13333 | 0.1921  |
| 124.65   | 0.159331 | 35.93333 | 0.24624 | 36.08333 | 0.34949 | 35.26667 | 0.10225 |
| 125.2    | 0.159331 | 36.06667 | 0.13288 | 36.21667 | 0.2776  | 35.4     | 0.14023 |
| 125.75   | 0.159331 | 36.21667 | 0.255   | 36.35    | 0.2797  | 35.53333 | 0.16692 |
| 126.3    | 0.159331 | 36.35    | 0.19423 | 36.48333 | 0.29539 | 35.66667 | 0.2045  |
| 126.8333 | 0.159331 | 36.48333 | 0.16758 | 36.61667 | 0.3332  | 35.81667 | 0.18474 |
| 127.3833 | 0.159331 | 36.61667 | 0.33181 | 36.76667 | 0.20759 | 35.95    | 0.19713 |
| 127.9333 | 0.159331 | 36.75    | 0.15768 | 36.9     | 0.27448 | 36.08333 | 0.10249 |
| 128.4833 | 0.159331 | 36.9     | 0.24651 | 37.03333 | 0.27225 | 36.21667 | 0.18822 |
| 129.0333 | 0.159331 | 37.03333 | 0.10211 | 37.16667 | 0.23539 | 36.35    | 0.13904 |
| 129.5667 | 0.159331 | 37.16667 | 0.24597 | 37.3     | 0.26691 | 36.5     | 0.19048 |
| 130.1167 | 0.159331 | 37.3     | 0.06217 | 37.45    | 0.30326 | 36.63333 | 0.18375 |
| 130.6667 | 0.159331 | 37.43333 | 0.37302 | 37.58333 | 0.39371 | 36.76667 | 0.08562 |
| 131.2167 | 0.159331 | 37.58333 | 0.1289  | 37.71667 | 0.28124 | 36.9     | 0.16557 |
| 131.7667 | 0.159331 | 37.71667 | 0.24872 | 37.85    | 0.31481 | 37.03333 | 0.19155 |
| 132.3    | 0.159331 | 37.85    | 0.11584 | 37.98333 | 0.19245 | 37.18333 | 0.15484 |
| 132.85   | 0.159331 | 37.98333 | 0.17336 | 38.13333 | 0.27811 | 37.31667 | 0.13195 |
| 133.4    | 0.159331 | 38.11667 | 0.29991 | 38.26667 | 0.21957 | 37.45    | 0.1805  |
| 133.95   | 0.159331 | 38.26667 | 0.17652 | 38.4     | 0.25977 | 37.58333 | 0.24909 |
| 134.5    | 0.159331 | 38.4     | 0.14214 | 38.53333 | 0.2362  | 37.71667 | 0.12613 |

|          |          |          |         |          |         |          |         |
|----------|----------|----------|---------|----------|---------|----------|---------|
| 135.0333 | 0.159331 | 38.53333 | 0.2363  | 38.66667 | 0.29039 | 37.86667 | 0.14106 |
| 135.5833 | 0.159331 | 38.66667 | 0.13789 | 38.81667 | 0.29394 | 38       | 0.19967 |
| 136.1333 | 0.159331 | 38.8     | 0.22179 | 38.95    | 0.32238 | 38.13333 | 0.19076 |
| 136.6833 | 0.159331 | 38.95    | -0.0047 | 39.08333 | 0.35026 | 38.26667 | 0.12359 |
| 137.2333 | 0.159331 | 39.08333 | 0.23454 | 39.21667 | 0.23351 | 38.4     | 0.07334 |
| 137.7667 | 0.159331 | 39.21667 | 0.09728 | 39.35    | 0.27007 | 38.55    | 0.1866  |
| 138.3167 | 0.159331 | 39.35    | 0.14115 | 39.5     | 0.22239 | 38.68333 | 0.1592  |
| 138.8667 | 0.159331 | 39.48333 | 0.25491 | 39.63333 | 0.26657 | 38.81667 | 0.14902 |
| 139.4167 | 0.159331 | 39.63333 | 0.2344  | 39.76667 | 0.26481 | 38.95    | 0.14423 |
| 139.9667 | 0.159331 | 39.76667 | 0.241   | 39.9     | 0.2448  | 39.08333 | 0.22066 |
| 140.5    | 0.159331 | 39.9     | 0.24407 | 40.03333 | 0.24052 | 39.23333 | 0.14205 |
| 141.05   | 0.159331 | 40.03333 | 0.13952 | 40.18333 | 0.28816 | 39.36667 | 0.15674 |
| 141.6    | 0.159331 | 40.16667 | 0.20445 | 40.31667 | 0.30792 | 39.5     | 0.04008 |
| 142.15   | 0.138849 | 40.31667 | 0.27073 | 40.45    | 0.25079 | 39.63333 | 0.14122 |
| 142.7    | 0.110449 | 40.45    | 0.19835 | 40.58333 | 0.23599 | 39.76667 | 0.20426 |
| 143.2333 | 0.113761 | 40.58333 | 0.15655 | 40.71667 | 0.27067 | 39.91667 | 0.16759 |
| 143.7833 | 0.13016  | 40.71667 | 0.19301 | 40.86667 | 0.31447 | 40.05    | 0.1047  |
| 144.3333 | 0.137414 | 40.85    | 0.15832 | 41       | 0.2974  | 40.18333 | 0.1367  |
| 144.8833 | 0.106937 | 41       | 0.30701 | 41.13333 | 0.20391 | 40.31667 | 0.10866 |
| 145.4333 | 0.181698 | 41.13333 | 0.13197 | 41.26667 | 0.24454 | 40.45    | 0.11346 |
| 145.9833 | 0.064452 | 41.26667 | 0.4201  | 41.4     | 0.27354 | 40.6     | 0.15167 |
| 146.5167 | 0.146227 | 41.4     | 0.13884 | 41.55    | 0.21965 | 40.73333 | 0.2005  |
| 147.0667 | 0.113191 | 41.53333 | 0.33534 | 41.68333 | 0.2891  | 40.86667 | 0.15421 |
| 147.6167 | 0.100098 | 41.68333 | 0.15822 | 41.81667 | 0.3202  | 41       | 0.21392 |
| 148.1667 | 0.145276 | 41.81667 | 0.20951 | 41.95    | 0.29077 | 41.13333 | 0.1847  |
| 148.7167 | 0.131064 | 41.95    | 0.07518 | 42.08333 | 0.27841 | 41.28333 | 0.1647  |
| 149.25   | 0.092436 | 42.08333 | 0.35906 | 42.23333 | 0.27704 | 41.41667 | 0.09837 |
| 149.8    | 0.175155 | 42.21667 | 0.20923 | 42.36667 | 0.28479 | 41.55    | 0.17603 |
| 150.35   | 0.107017 | 42.36667 | 0.19202 | 42.5     | 0.21589 | 41.68333 | 0.10863 |
| 150.9    | 0.134168 | 42.5     | 0.22961 | 42.63333 | 0.25545 | 41.81667 | 0.2079  |
| 151.45   | 0.153395 | 42.63333 | 0.08246 | 42.76667 | 0.24339 | 41.96667 | 0.15139 |
| 151.9833 | 0.138917 | 42.76667 | 0.43934 | 42.91667 | 0.32811 | 42.1     | 0.15421 |
| 152.5333 | 0.15812  | 42.9     | 0.09728 | 43.05    | 0.27931 | 42.23333 | 0.18327 |
| 153.0833 | 0.115329 | 43.05    | 0.21073 | 43.18333 | 0.27465 | 42.36667 | 0.1864  |
| 153.6333 | 0.116516 | 43.18333 | 0.345   | 43.31667 | 0.32849 | 42.5     | 0.08633 |
| 154.1833 | 0.120737 | 43.31667 | 0.09868 | 43.45    | 0.2551  | 42.65    | 0.1228  |
| 154.7167 | 0.117023 | 43.45    | 0.37446 | 43.6     | 0.31331 | 42.78333 | 0.167   |
| 155.2667 | 0.138312 | 43.58333 | 0.01848 | 43.73333 | 0.26678 | 42.91667 | 0.18256 |
| 155.8167 | 0.122848 | 43.73333 | 0.30755 | 43.86667 | 0.2646  | 43.05    | 0.17203 |
| 156.3667 | 0.112024 | 43.86667 | 0.15904 | 44       | 0.25908 | 43.18333 | 0.15524 |
| 156.9167 | 0.107968 | 44       | 0.25997 | 44.13333 | 0.27598 | 43.33333 | 0.17939 |
| 157.45   | 0.141844 | 44.13333 | 0.06411 | 44.28333 | 0.26528 | 43.46667 | 0.16304 |
| 158      | 0.146933 | 44.26667 | 0.32684 | 44.41667 | 0.17714 | 43.6     | 0.25923 |
| 158.55   | 0.128266 | 44.41667 | 0.17806 | 44.55    | 0.2439  | 43.73333 | 0.13278 |
| 159.1    | 0.13018  | 44.55    | 0.17716 | 44.68333 | 0.27529 | 43.86667 | 0.12688 |
| 159.65   | 0.121891 | 44.68333 | 0.27976 | 44.81667 | 0.25788 | 44.01667 | 0.16664 |
| 160.1833 | 0.109766 | 44.81667 | 0.21642 | 44.96667 | 0.24377 | 44.15    | 0.13302 |
| 160.7333 | 0.121736 | 44.95    | 0.17006 | 45.1     | 0.26507 | 44.28333 | 0.12577 |
| 161.2833 | 0.10197  | 45.1     | 0.22957 | 45.23333 | 0.29022 | 44.41667 | 0.05093 |
| 161.8333 | 0.109818 | 45.23333 | 0.18502 | 45.36667 | 0.26443 | 44.55    | 0.15591 |

|          |          |          |          |          |         |          |         |
|----------|----------|----------|----------|----------|---------|----------|---------|
| 162.3833 | 0.143991 | 45.36667 | 0.25392  | 45.5     | 0.21743 | 44.7     | 0.19832 |
| 162.9167 | 0.13424  | 45.5     | 0.16672  | 45.65    | 0.28402 | 44.83333 | 0.15167 |
| 163.4667 | 0.122837 | 45.63333 | 0.16071  | 45.78333 | 0.27863 | 44.96667 | 0.09298 |
| 164.0167 | 0.130193 | 45.78333 | 0.24407  | 45.91667 | 0.30022 | 45.1     | 0.19187 |
| 164.5667 | 0.127441 | 45.91667 | 0.2222   | 46.05    | 0.34141 | 45.23333 | 0.05164 |
| 165.1167 | 0.142097 | 46.05    | 0.19907  | 46.18333 | 0.26836 | 45.38333 | 0.12506 |
| 165.65   | 0.114982 | 46.18333 | 0.28202  | 46.33333 | 0.31459 | 45.51667 | 0.23341 |
| 166.2    | 0.131889 | 46.31667 | 0.16333  | 46.46667 | 0.26665 | 45.65    | 0.15429 |
| 166.75   | 0.125851 | 46.46667 | 0.34853  | 46.6     | 0.188   | 45.78333 | 0.16787 |
| 167.3    | 0.080354 | 46.6     | 0.05467  | 46.73333 | 0.2448  | 45.91667 | 0.14835 |
| 167.85   | 0.133637 | 46.73333 | 0.27181  | 46.86667 | 0.30754 | 46.06667 | 0.13029 |
| 168.3833 | 0.110868 | 46.86667 | 0.03136  | 47.01667 | 0.30938 | 46.2     | 0.1207  |
| 168.9333 | 0.099707 | 47       | 0.28803  | 47.15    | 0.28102 | 46.33333 | 0.21464 |
| 169.4833 | 0.107817 | 47.15    | 0.12841  | 47.28333 | 0.26327 | 46.46667 | 0.1586  |
| 170.0333 | 0.110185 | 47.28333 | 0.34284  | 47.41667 | 0.30809 | 46.6     | 0.14046 |
| 170.5833 | 0.125838 | 47.41667 | 0.15682  | 47.55    | 0.31562 | 46.75    | 0.09433 |
| 171.1167 | 0.124037 | 47.55    | 0.24484  | 47.7     | 0.22474 | 46.88333 | 0.14435 |
| 171.6667 | 0.062476 | 47.68333 | 0.11774  | 47.83333 | 0.20417 | 47.01667 | 0.1493  |
| 172.2167 | 0.082776 | 47.83333 | 0.22957  | 47.96667 | 0.29749 | 47.15    | 0.12676 |
| 172.7667 | 0.115098 | 47.96667 | 0.21823  | 48.1     | 0.22363 | 47.28333 | 0.11504 |
| 173.3167 | 0.099768 | 48.1     | 0.07627  | 48.23333 | 0.19425 | 47.43333 | 0.14256 |
| 173.85   | 0.112056 | 48.23333 | 0.22238  | 48.38333 | 0.24467 | 47.56667 | 0.171   |
| 174.4    | 0.133906 | 48.36667 | -0.02693 | 48.51667 | 0.24403 | 47.7     | 0.16375 |
| 174.95   | 0.132406 | 48.51667 | 0.25514  | 48.65    | 0.26798 | 47.83333 | 0.13971 |
| 175.5    | 0.060279 | 48.65    | 0.07017  | 48.78333 | 0.25489 | 47.96667 | 0.12866 |
| 176.05   | 0.109172 | 48.78333 | 0.29386  | 48.91667 | 0.24454 | 48.11667 | 0.15662 |
| 176.5833 | 0.077802 | 48.91667 | 0.14815  | 49.06667 | 0.2826  | 48.25    | 0.04752 |
| 177.1333 | 0.08162  | 49.05    | 0.19604  | 49.2     | 0.21862 | 48.38333 | 0.12977 |
| 177.6833 | 0.190023 | 49.2     | 0.20223  | 49.33333 | 0.25369 | 48.51667 | 0.14894 |
| 178.2333 | 0.116153 | 49.33333 | 0.19062  | 49.46667 | 0.21957 | 48.65    | 0.20331 |
| 178.7833 | 0.052604 | 49.46667 | 0.1772   | 49.6     | 0.23355 | 48.8     | 0.10672 |
| 179.3167 | 0.123898 | 49.6     | 0.15163  | 49.75    | 0.22812 | 48.93333 | 0.14177 |
| 179.8667 | 0.082446 | 49.73333 | 0.18488  | 49.88333 | 0.26079 | 49.06667 | 0.11468 |
| 180.4167 | 0.149425 | 49.88333 | 0.11584  | 50.01667 | 0.31169 | 49.2     | 0.14506 |
| 180.9667 | 0.128883 | 50.01667 | 0.18014  | 50.15    | 0.25746 | 49.33333 | 0.08514 |
| 181.5167 | 0.0694   | 50.15    | 0.13871  | 50.28333 | 0.21833 | 49.48333 | 0.18593 |
| 182.05   | 0.097741 | 50.28333 | 0.15533  | 50.43333 | 0.30288 | 49.61667 | 0.17017 |
| 182.6    | 0.076056 | 50.41667 | 0.14033  | 50.56667 | 0.30429 | 49.75    | 0.05235 |
| 183.15   | 0.064452 | 50.56667 | 0.17869  | 50.7     | 0.23385 | 49.88333 | 0.12264 |
| 183.7    | 0.130733 | 50.7     | 0.19979  | 50.83333 | 0.27439 | 50.01667 | 0.12577 |
| 184.25   | 0.143361 | 50.83333 | 0.20761  | 50.96667 | 0.24689 | 50.16667 | 0.14193 |
| 184.7833 | 0.080122 | 50.96667 | 0.14458  | 51.11667 | 0.32516 | 50.3     | 0.17317 |
| 185.3333 | 0.121354 | 51.1     | 0.14973  | 51.25    | 0.12189 | 50.43333 | 0.10106 |
| 185.8833 | 0.088866 | 51.25    | 0.15172  | 51.38333 | 0.26409 | 50.56667 | 0.14989 |
| 186.4333 | 0.080192 | 51.38333 | 0.15339  | 51.51667 | 0.23154 | 50.7     | 0.10938 |
| 186.9833 | 0.146491 | 51.51667 | 0.18542  | 51.65    | 0.33076 | 50.85    | 0.11025 |
| 187.5167 | 0.111583 | 51.65    | 0.16378  | 51.8     | 0.28581 | 50.98333 | 0.13084 |
| 188.0667 | 0.080976 | 51.78333 | 0.22943  | 51.93333 | 0.19998 | 51.11667 | 0.16347 |
| 188.6167 | 0.118268 | 51.93333 | 0.13152  | 52.06667 | 0.22085 | 51.25    | 0.06558 |
| 189.1667 | 0.064647 | 52.06667 | 0.11449  | 52.2     | 0.24386 | 51.38333 | 0.12557 |

|          |          |          |         |          |         |          |         |
|----------|----------|----------|---------|----------|---------|----------|---------|
| 189.7167 | 0.048111 | 52.2     | 0.18597 | 52.33333 | 0.26156 | 51.53333 | 0.11468 |
| 190.25   | 0.111115 | 52.33333 | 0.13563 | 52.48333 | 0.25305 | 51.66667 | 0.13155 |
| 190.8    | 0.097179 | 52.46667 | 0.15931 | 52.61667 | 0.24659 | 51.8     | 0.13108 |
| 191.35   | 0.04422  | 52.61667 | 0.02151 | 52.75    | 0.22111 | 51.93333 | 0.14557 |
| 191.9    | 0.129819 | 52.75    | 0.15077 | 52.88333 | 0.19314 | 52.06667 | 0.24117 |
| 192.45   | 0.142207 | 52.88333 | 0.04143 | 53.01667 | 0.22868 | 52.21667 | 0.075   |
| 192.9833 | 0.058377 | 53.01667 | 0.26052 | 53.16667 | 0.31536 | 52.35    | 0.11429 |
| 193.5333 | 0.081609 | 53.15    | 0.10157 | 53.3     | 0.25596 | 52.48333 | 0.12973 |
| 194.0833 | 0.144929 | 53.3     | 0.24597 | 53.43333 | 0.32529 | 52.61667 | 0.12625 |
| 194.6333 | 0.064452 | 53.43333 | 0.10965 | 53.56667 | 0.28632 | 52.75    | 0.17797 |
| 195.1833 | 0.130656 | 53.56667 | 0.07057 | 53.7     | 0.21734 | 52.9     | 0.16232 |
| 195.7167 | 0.121945 | 53.7     | 0.15181 | 53.85    | 0.34684 | 53.03333 | 0.15361 |
| 196.2667 | 0.076634 |          | 0.16234 |          | 0.25746 | 53.16667 | 0.24743 |
| 196.8167 | 0.137307 |          | 0.13342 |          | 0.25938 | 53.3     | 0.14446 |
| 197.3667 | 0.134554 |          | 0.22672 |          | 0.31793 | 53.43333 | 0.12942 |
| 197.9167 | 0.030679 |          | 0.16577 |          | 0.20143 | 53.58333 | 0.17607 |
| 198.4667 | 0.116164 |          | 0.12904 |          | 0.28752 | 53.71667 | 0.13508 |
| 199      | 0.139071 |          | 0.25202 |          | 0.11513 | 53.85    | 0.0533  |
| 199.55   | 0.115041 |          | 0.17499 |          | 0.21691 | 53.98333 | 0.1746  |
| 200.1    | 0.133277 |          | 0.27167 |          | 0.29945 | 54.11667 | 0.15943 |
| 200.65   | 0.105196 |          | 0.0647  |          | 0.22085 | 54.26667 | 0.14518 |
| 201.2    | 0.080387 |          | 0.2274  |          | 0.20759 | 54.4     | 0.14169 |
| 201.7333 | 0.051029 |          | 0.33814 |          | 0.18963 | 54.53333 | 0.12542 |
| 202.2833 | 0.086542 |          | 0.00624 |          | 0.29154 | 54.66667 | 0.07065 |
| 202.8333 | 0.048665 |          | 0.34803 |          | 0.27435 | 54.8     | 0.13274 |
| 203.3833 | 0.066533 |          | 0.07898 |          | 0.2318  | 54.95    | 0.18458 |
| 203.9333 | 0.127906 |          | 0.08711 |          | 0.30172 | 55.08333 | 0.17987 |
| 204.4667 | 0.121549 |          | 0.23512 |          | 0.2918  | 55.21667 | 0.1466  |
| 205.0167 | 0.080141 |          | 0.18985 |          | 0.24223 | 55.35    | 0.12938 |
| 205.5667 | 0.106595 |          | 0.23648 |          | 0.29963 | 55.48333 | 0.22184 |
| 206.1167 | 0.096651 |          | 0.27646 |          | 0.21614 | 55.63333 | 0.14169 |
| 206.6667 | 0.020658 |          | 0.13762 |          | 0.18518 | 55.76667 | 0.06392 |
| 207.2    | 0.091718 |          | 0.2541  |          | 0.21931 | 55.9     | 0.17832 |
| 207.75   | 0.128665 |          | 0.24199 |          | 0.24848 | 56.03333 | 0.14831 |
| 208.3    | 0.075057 |          | 0.26305 |          | 0.20652 | 56.16667 | 0.13551 |
| 208.85   | 0.103112 |          | 0.23359 |          | 0.28021 | 56.31667 | 0.09635 |
| 209.4    | 0.158692 |          | 0.26079 |          | 0.29689 | 56.45    | 0.119   |
| 209.9333 | 0.079267 |          | 0.2325  |          | 0.21726 | 56.58333 | 0.20616 |
| 210.4833 | 0.120183 |          | 0.29146 |          | 0.24544 | 56.71667 | 0.18133 |
| 211.0333 | 0.06616  |          | 0.16898 |          | 0.20391 | 56.85    | 0.14458 |
| 211.5833 | 0.097458 |          | 0.28288 |          | 0.21093 | 57       | 0.0217  |
| 212.1333 | 0.067206 |          | 0.20056 |          | 0.2395  | 57.13333 | 0.1272  |
|          |          |          | 0.28094 |          | 0.35334 | 57.26667 | 0.19991 |
|          |          |          | 0.22008 |          | 0.2448  | 57.4     | 0.09092 |
|          |          |          | 0.20512 |          | 0.19429 | 57.53333 | 0.16387 |
|          |          |          | 0.21651 |          | 0.20314 | 57.68333 | 0.15215 |
|          |          |          | 0.2171  |          | 0.27944 | 57.81667 | 0.12831 |
|          |          |          | 0.25446 |          | 0.3276  | 57.95    | 0.18244 |
|          |          |          |         |          | 0.26627 | 58.08333 | 0.16157 |
| 216.5    | 0.078908 |          |         |          |         | 58.21667 | 0.06851 |

|          |          |          |         |
|----------|----------|----------|---------|
| 217.05   | 0.086245 | 58.36667 | 0.03041 |
| 217.6    | 0.079742 | 58.5     | 0.03041 |
| 218.1333 | 0.086069 | 58.63333 | 0.03041 |
| 218.6833 | 0.156273 | 58.76667 | 0.03041 |
| 219.2333 | 0.114358 | 58.9     | 0.13646 |
| 219.7833 | 0.106672 | 59.05    | 0.08154 |
| 220.3333 | 0.100131 | 59.18333 | 0.17076 |
| 220.8667 | 0.131041 | 59.31667 | 0.13888 |
| 221.4167 | 0.103638 | 59.45    | 0.15064 |
| 221.9667 | 0.0654   | 59.58333 | 0.19895 |
| 222.5167 | 0.130232 | 59.73333 | 0.12518 |
| 223.0667 | 0.076543 | 59.86667 | 0.11096 |
| 223.6    | 0.043912 | 60       | 0.21511 |
| 224.15   | 0.093656 | 60.13333 | 0.13686 |
| 224.7    | 0.129356 | 60.26667 | 0.1135  |
| 225.25   | 0.079473 | 60.41667 | 0.08007 |
| 225.8    | 0.112629 | 60.55    | 0.1266  |
| 226.3333 | 0.141679 | 60.68333 | 0.05069 |
| 226.8833 | 0.120613 | 60.81667 | 0.10019 |
| 227.4333 | 0.075027 | 60.95    | 0.14122 |
| 227.9833 | 0.075783 | 61.1     | 0.24236 |
| 228.5333 | 0.106022 | 61.23333 | 0.11829 |
| 229.0667 | 0.092872 | 61.36667 | 0.13314 |
| 229.6167 | 0.089285 | 61.5     | 0.13179 |
| 230.1667 | 0.083918 | 61.63333 | 0.13219 |
| 230.7167 | 0.116506 | 61.78333 | 0.15036 |
| 231.2667 | 0.064737 | 61.91667 | 0.16347 |
| 231.8    | 0.100946 | 62.05    | 0.16446 |
| 232.35   | 0.10586  | 62.18333 | 0.17789 |
| 232.9    | 0.132814 | 62.31667 | 0.16371 |
|          |          | 62.46667 | 0.13433 |
|          |          | 62.6     | 0.16086 |
|          |          | 62.73333 | 0.17892 |
|          |          | 62.86667 | 0.13191 |
|          |          | 63       | 0.19024 |
|          |          | 63.15    | 0.1746  |
|          |          | 63.28333 | 0.09271 |
|          |          | 63.41667 | 0.16925 |
|          |          | 63.55    | 0.13805 |
|          |          | 63.68333 | 0.16122 |
|          |          | 63.83333 | 0.05623 |
|          |          | 63.96667 | 0.11829 |
|          |          | 64.1     | 0.25099 |
|          |          | 64.23333 | 0.11215 |
|          |          | 64.36667 | 0.14094 |
|          |          | 64.51667 | 0.13963 |
|          |          | 64.65    | 0.12157 |
|          |          | 64.78333 | 0.12371 |
|          |          | 64.91667 | 0.11888 |
|          |          | 65.05    | 0.11251 |

|          |         |
|----------|---------|
| 65.2     | 0.14062 |
| 65.33333 | 0.12205 |
| 65.46667 | 0.11651 |
| 65.6     | 0.12518 |
| 65.73333 | 0.12878 |
| 65.88333 | 0.18003 |
| 66.01667 | 0.07477 |
| 66.15    | 0.08898 |
| 66.28333 | 0.1605  |
| 66.41667 | 0.03889 |
| 66.56667 | 0.12154 |
| 66.7     | 0.0895  |
| 66.83333 | 0.12641 |
| 66.96667 | 0.17195 |
| 67.1     | 0.13084 |
| 67.25    | 0.16205 |
| 67.38333 | 0.13916 |
| 67.51667 | 0.20981 |
| 67.65    | 0.18391 |
| 67.78333 | 0.10253 |
| 67.93333 | 0.0415  |
| 68.06667 | 0.16771 |
| 68.2     | 0.14035 |
| 68.33333 | 0.18494 |
| 68.46667 | 0.13421 |
| 68.61667 | 0.18605 |
| 68.75    | 0.14906 |
| 68.88333 | 0.13215 |
| 69.01667 | 0.07441 |
| 69.15    | 0.1881  |
| 69.3     | 0.11203 |
| 69.43333 | 0.08728 |
| 69.56667 | 0.08625 |
| 69.7     | 0.09441 |
| 69.83333 | 0.13433 |
| 69.98333 | 0.1089  |
| 70.11667 | 0.12553 |
| 70.25    | 0.10827 |
| 70.38333 | 0.14482 |
| 70.51667 | 0.15825 |
| 70.66667 | 0.16347 |
| 70.8     | 0.16181 |
| 70.93333 | 0.13068 |
| 71.06667 | 0.09995 |
| 71.2     | 0.09651 |
| 71.35    | 0.14684 |
| 71.48333 | 0.07477 |
| 71.61667 | 0.10253 |
| 71.75    | 0.09552 |
| 71.88333 | 0.13417 |

|          |         |
|----------|---------|
| 72.03333 | 0.08673 |
| 72.16667 | 0.09837 |
| 72.3     | 0.11801 |
| 72.43333 | 0.16181 |
| 72.56667 | 0.19436 |
| 72.71667 | 0.10166 |
| 72.85    | 0.19175 |
| 72.98333 | 0.09702 |
| 73.11667 | 0.08926 |
| 73.25    | 0.21076 |
| 73.4     | 0.13048 |
| 73.53333 | 0.10819 |
| 73.66667 | 0.18446 |
| 73.8     | 0.17642 |
| 73.93333 | 0.123   |
| 74.08333 | 0.11358 |
| 74.21667 | 0.13464 |
| 74.35    | 0.12791 |
| 74.48333 | 0.15401 |
| 74.61667 | 0.13639 |
| 74.76667 | 0.14399 |
| 74.9     | 0.12886 |
| 75.03333 | 0.17337 |
|          | 0.04443 |
|          | 0.09441 |
|          | 0.08585 |
|          | 0.10518 |
|          | 0.12336 |
|          | 0.12023 |
|          | 0.12205 |
|          | 0.12748 |
|          | 0.15167 |
|          | 0.14395 |
|          | 0.08467 |
|          | 0.19389 |
|          | 0.13916 |
|          | 0.0809  |
|          | 0.07405 |
|          | 0.15504 |
|          | 0.075   |
|          | 0.08657 |
|          | 0.12201 |
|          | 0.12197 |
|          | 0.09952 |
|          | 0.09393 |
|          | 0.19872 |
|          | 0.10922 |
|          | 0.16882 |
|          | 0.13742 |
|          | 0.09504 |

0.11429

0.16925

0.04491



| NO       | 11 NO           |          | 12 NO           |          | 13 NO           |          | 14 NO              |          | 15               |
|----------|-----------------|----------|-----------------|----------|-----------------|----------|--------------------|----------|------------------|
| t        | H=0.120T=70 t   |          | H=0.075T=70 t   |          | H=0.030T=70 t   |          | H=0.030T=70iso15 t |          | H=0.030T=70iso30 |
| min      | KgPP/(min.gcat) | min      | KgPP/(min.gcat) | min      | KgPP/(min.gcat) | min      | KgPP/(min.gcat)    | min      | KgPP/(min.gcat)  |
| 0        | 0               | 0        | 0               | 0        | 0               | 0        | 0                  | 0        | 0                |
| 3.08333  | 0.50929         | 3.06667  | 0.72102         | 4.683333 | 0.305106        | 5.01667  | 1.73               | 2.233333 | 0.385939         |
| 3.28333  | 0.53571         | 3.28333  | 0.75131         | 4.783333 | 0.514276        | 5.15     | 2.39284            | 2.45     | 0.505019         |
| 3.48333  | 0.77732         | 3.48333  | 0.83736         | 4.883333 | 0.436335        | 5.26667  | 1.52516            | 2.65     | 0.608247         |
| 3.7      | 1.18711         | 3.68333  | 1.14921         | 4.983333 | 0.599128        | 5.4      | 1.21296            | 2.85     | 0.763603         |
| 3.9      | 1.22981         | 3.9      | 1.38318         | 5.083333 | 0.616277        | 5.51667  | 1.87502            | 3.05     | 0.876999         |
| 4.1      | 1.42325         | 4.1      | 1.52205         | 5.183333 | 0.760032        | 5.65     | 2.07704            | 3.266667 | 1.00597          |
| 4.3      | 1.55671         | 4.3      | 1.90319         | 5.283333 | 0.60047         | 5.76667  | 1.62987            | 3.466667 | 1.044244         |
| 4.51667  | 1.8195          | 4.51667  | 1.7661          | 5.383333 | 0.788862        | 5.9      | 1.46294            | 3.666667 | 1.251779         |
| 4.71667  | 1.99034         | 4.71667  | 1.8909          | 5.483333 | 0.886786        | 6.01667  | 1.9044             | 3.866667 | 1.309346         |
| 4.91667  | 2.09203         | 4.91667  | 2.10775         | 5.583333 | 0.833201        | 6.15     | 1.76953            | 4.066667 | 1.419058         |
| 5.13333  | 2.08081         | 5.11667  | 2.18198         | 5.7      | 0.959161        | 6.26667  | 1.78612            | 4.283333 | 1.518862         |
| 5.33333  | 2.36828         | 5.33333  | 2.16472         | 5.8      | 0.89464         | 6.4      | 1.81798            | 4.483333 | 1.536279         |
| 5.53333  | 2.6111          | 5.53333  | 2.27173         | 5.9      | 1.074582        | 6.51667  | 1.72825            | 4.683333 | 1.687915         |
| 5.75     | 2.60729         | 5.73333  | 2.47382         | 6        | 1.132542        | 6.65     | 1.80295            | 4.883333 | 1.705331         |
| 5.95     | 2.77854         | 5.95     | 2.34383         | 6.1      | 1.183045        | 6.76667  | 1.84253            | 5.1      | 1.766861         |
| 6.15     | 2.86167         | 6.15     | 2.54339         | 6.2      | 1.218834        | 6.9      | 1.80412            | 5.3      | 1.723164         |
| 6.35     | 3.02005         | 6.35     | 2.45554         | 6.3      | 1.174445        | 7.03333  | 1.84145            | 5.5      | 1.791161         |
| 6.56667  | 3.0631          | 6.56667  | 2.46263         | 6.4      | 1.215355        | 7.15     | 1.8031             | 5.7      | 1.86239          |
| 6.76667  | 3.2036          | 6.76667  | 2.44168         | 6.5      | 1.241501        | 7.28333  | 1.89396            | 5.916667 | 1.90421          |
| 6.96667  | 3.27717         | 6.96667  | 2.45279         | 6.6      | 1.259396        | 7.4      | 1.82066            | 6.116667 | 1.999843         |
| 7.18333  | 3.26143         | 7.16667  | 2.44808         | 6.716667 | 1.276893        | 7.53333  | 1.86282            | 6.316667 | 1.90866          |
| 7.38333  | 3.26383         | 7.38333  | 2.41279         | 6.816667 | 1.321083        | 7.65     | 1.83428            | 6.516667 | 1.910311         |
| 7.58333  | 3.30398         | 7.58333  | 2.41293         | 6.916667 | 1.265361        | 7.78333  | 1.82593            | 6.716667 | 1.884395         |
| 7.8      | 3.2395          | 7.78333  | 2.43622         | 7.016667 | 1.333162        | 7.9      | 1.81559            | 6.933333 | 1.932681         |
| 8        | 3.28441         | 8        | 2.3823          | 7.116667 | 1.374022        | 8.03333  | 1.67447            | 7.133333 | 1.899204         |
| 8.2      | 3.1902          | 8.2      | 2.32679         | 7.216667 | 1.326998        | 8.15     | 1.77597            | 7.333333 | 1.840489         |
| 8.41667  | 3.18776         | 8.4      | 2.28919         | 7.316667 | 1.266057        | 8.28333  | 1.80544            | 7.533333 | 1.848989         |
| 8.61667  | 3.15691         | 8.61667  | 2.213           | 7.416667 | 1.384659        | 8.4      | 1.81481            | 7.75     | 1.821404         |
| 8.81667  | 3.0806          | 8.81667  | 2.13605         | 7.516667 | 1.322028        | 8.53333  | 1.63134            | 7.95     | 1.818276         |
| 9.01667  | 2.94672         | 9.01667  | 2.15892         | 7.616667 | 1.41518         | 8.66667  | 1.77826            | 8.15     | 1.752018         |
| 9.23333  | 2.90974         | 9.21667  | 1.98939         | 7.733333 | 1.400814        | 8.78333  | 1.65427            | 8.35     | 1.743344         |
| 9.43333  | 2.92291         | 9.43333  | 1.96475         | 7.833333 | 1.514198        | 8.91667  | 1.70268            | 8.566667 | 1.772597         |
| 9.63333  | 2.82828         | 9.63333  | 1.94378         | 7.933333 | 1.413192        | 9.03333  | 1.63378            | 8.766667 | 1.647138         |
| 9.85     | 2.65677         | 9.83333  | 2.0655          | 8.033333 | 1.349267        | 9.16667  | 1.68872            | 8.966667 | 1.713535         |
| 10.05    | 2.68532         | 10.05    | 1.93373         | 8.133333 | 1.370095        | 9.28333  | 1.58918            | 9.166667 | 1.644478         |
| 10.25    | 2.50145         | 10.25    | 1.80213         | 8.233333 | 1.451566        | 9.41667  | 1.57303            | 9.366667 | 1.704288         |
| 10.46667 | 2.44031         | 10.45    | 1.71365         | 8.333333 | 1.468467        | 9.53333  | 1.54673            | 9.583333 | 1.58512          |
| 10.66667 | 2.33952         | 10.66667 | 1.73702         | 8.433333 | 1.386151        | 9.66667  | 1.55502            | 9.783333 | 1.604431         |
| 10.86667 | 2.22018         | 10.86667 | 1.68349         | 8.533333 | 1.40842         | 9.78333  | 1.44572            | 9.983333 | 1.496649         |
| 11.06667 | 2.19742         | 11.06667 | 1.68561         | 8.633333 | 1.380683        | 9.91667  | 1.44826            | 10.18333 | 1.583209         |
| 11.28333 | 2.0684          | 11.26667 | 1.56089         | 8.75     | 1.426414        | 10.03333 | 1.5639             | 10.4     | 1.469673         |
| 11.48333 | 2.03077         | 11.48333 | 1.5118          | 8.85     | 1.348671        | 10.16667 | 1.398              | 10.6     | 1.43345          |
| 11.68333 | 1.9012          | 11.68333 | 1.54003         | 8.95     | 1.37432         | 10.28333 | 1.5155             | 10.8     | 1.39521          |
| 11.9     | 1.90553         | 11.88333 | 1.36141         | 9.05     | 1.341414        | 10.41667 | 1.44835            | 11       | 1.339642         |
| 12.1     | 1.7973          | 12.1     | 1.43504         | 9.15     | 1.38625         | 10.55    | 1.34256            | 11.21667 | 1.338547         |
| 12.3     | 1.6592          | 12.3     | 1.30468         | 9.25     | 1.343501        | 10.66667 | 1.35779            | 11.41667 | 1.293043         |

|          |         |          |         |          |          |          |         |          |          |
|----------|---------|----------|---------|----------|----------|----------|---------|----------|----------|
| 12.51667 | 1.66588 | 12.5     | 1.36863 | 9.35     | 1.367659 | 10.8     | 1.29533 | 11.61667 | 1.305748 |
| 12.71667 | 1.61487 | 12.71667 | 1.30939 | 9.45     | 1.317653 | 10.91667 | 1.31304 | 11.81667 | 1.239125 |
| 12.91667 | 1.47477 | 12.91667 | 1.25296 | 9.55     | 1.26208  | 11.05    | 1.3129  | 12.01667 | 1.301264 |
| 13.11667 | 1.46994 | 13.11667 | 1.25795 | 9.65     | 1.294191 | 11.16667 | 1.3067  | 12.23333 | 1.178638 |
| 13.33333 | 1.36081 | 13.31667 | 1.20906 | 9.766667 | 1.325308 | 11.3     | 1.17178 | 12.43333 | 1.176795 |
| 13.53333 | 1.27768 | 13.53333 | 1.19188 | 9.866667 | 1.166442 | 11.41667 | 1.29953 | 12.63333 | 1.181488 |
| 13.73333 | 1.29239 | 13.73333 | 1.24348 | 9.966667 | 1.286238 | 11.55    | 1.32949 | 12.83333 | 1.118706 |
| 13.95    | 1.21957 | 13.93333 | 1.14538 | 10.06667 | 1.22122  | 11.66667 | 1.20223 | 13.05    | 1.139251 |
| 14.15    | 1.21569 | 14.15    | 1.13258 | 10.16667 | 1.23663  | 11.8     | 1.13879 | 13.25    | 1.167131 |
| 14.35    | 1.12521 | 14.35    | 1.03175 | 10.26667 | 1.193682 | 11.91667 | 1.19344 | 13.45    | 1.073288 |
| 14.56667 | 1.16958 | 14.55    | 1.05378 | 10.36667 | 1.203027 | 12.05    | 1.25551 | 13.65    | 1.020153 |
| 14.76667 | 1.11148 | 14.76667 | 1.03371 | 10.46667 | 1.161621 | 12.16667 | 1.07936 | 13.86667 | 1.071098 |
| 14.96667 | 1.05872 | 14.96667 | 1.01606 | 10.56667 | 1.233647 | 12.3     | 1.16817 | 14.06667 | 1.059749 |
| 15.16667 | 1.04001 | 15.16667 | 0.96428 | 10.66667 | 1.112559 | 12.43333 | 1.1161  | 14.26667 | 1.023647 |
| 15.38333 | 0.99554 | 15.36667 | 0.92428 | 10.78333 | 1.140395 | 12.55    | 1.12572 | 14.46667 | 0.940615 |
| 15.58333 | 0.91538 | 15.58333 | 0.90376 | 10.88333 | 1.127968 | 12.68333 | 1.04462 | 14.68333 | 0.99137  |
| 15.78333 | 1.01145 | 15.78333 | 0.89546 | 10.98333 | 1.095161 | 12.8     | 1.07643 | 14.88333 | 0.897562 |
| 16       | 0.90625 | 15.98333 | 0.80319 | 11.08333 | 1.126775 | 12.93333 | 0.99738 | 15.08333 | 0.919584 |
| 16.2     | 0.77333 | 16.2     | 0.83094 | 11.18333 | 1.131349 | 13.05    | 0.99973 | 15.28333 | 0.986937 |
| 16.4     | 0.86715 | 16.4     | 0.99051 | 11.28333 | 1.107688 | 13.18333 | 1.01441 | 15.48333 | 0.923825 |
| 16.61667 | 0.84873 | 16.6     | 0.7813  | 11.38333 | 1.067474 | 13.3     | 0.93502 | 15.7     | 0.914874 |
| 16.81667 | 0.80576 | 16.81667 | 0.83272 | 11.48333 | 1.003301 | 13.43333 | 0.99026 | 15.9     | 0.841228 |
| 17.01667 | 0.64007 | 17.01667 | 0.79373 | 11.58333 | 0.99843  | 13.55    | 0.96469 | 16.1     | 0.867996 |
| 17.21667 | 0.88217 | 17.21667 | 0.82306 | 11.68333 | 1.038097 | 13.68333 | 0.96825 | 16.3     | 0.768887 |
| 17.43333 | 0.71688 | 17.41667 | 0.67713 | 11.8     | 0.951904 | 13.8     | 0.9439  | 16.51667 | 0.794733 |
| 17.63333 | 0.65686 | 17.63333 | 0.76867 | 11.9     | 1.046547 | 13.93333 | 0.93454 | 16.71667 | 0.793742 |
| 17.83333 | 0.6695  | 17.83333 | 0.74297 | 12       | 1.010857 | 14.06667 | 0.96859 | 16.91667 | 0.841785 |
| 18.05    | 0.66105 | 18.03333 | 0.70492 | 12.1     | 1.055992 | 14.18333 | 0.89384 | 17.11667 | 0.784356 |
| 18.25    | 0.69469 | 18.25    | 0.59062 | 12.2     | 0.964132 | 14.31667 | 0.91389 | 17.33333 | 0.757415 |
| 18.45    | 0.52626 | 18.45    | 0.69983 | 12.3     | 0.940769 | 14.43333 | 0.98109 | 17.53333 | 0.809646 |
| 18.66667 | 0.56024 | 18.65    | 0.75936 | 12.4     | 1.034816 | 14.56667 | 0.88271 | 17.73333 | 0.730995 |
| 18.86667 | 0.66361 | 18.86667 | 0.74499 | 12.5     | 0.819283 | 14.68333 | 0.85178 | 17.93333 | 0.82993  |
| 19.06667 | 0.57636 | 19.06667 | 0.69254 | 12.6     | 0.968506 | 14.81667 | 0.88345 | 18.13333 | 0.749802 |
| 19.26667 | 0.6218  | 19.26667 | 0.68491 | 12.7     | 0.856266 | 14.93333 | 0.85656 | 18.35    | 0.798018 |
| 19.48333 | 0.62863 | 19.48333 | 0.74725 | 12.81667 | 0.903438 | 15.06667 | 0.86173 | 18.55    | 0.764854 |
| 19.68333 | 0.55344 | 19.68333 | 0.65431 | 12.91667 | 0.811728 | 15.18333 | 0.84856 | 18.75    | 0.77398  |
| 19.88333 | 0.59038 | 19.88333 | 0.74022 | 13.01667 | 0.875652 | 15.31667 | 0.81523 | 18.95    | 0.711719 |
| 20.1     | 0.63181 | 20.08333 | 0.78246 | 13.11667 | 0.956079 | 15.43333 | 0.77722 | 19.16667 | 0.744448 |
| 20.3     | 0.44426 | 20.3     | 0.64848 | 13.21667 | 0.869538 | 15.56667 | 0.80488 | 19.36667 | 0.770903 |
| 20.5     | 0.58483 | 20.5     | 0.76296 | 13.31667 | 0.855669 | 15.68333 | 0.81791 | 19.56667 | 0.747959 |
| 20.71667 | 0.66538 | 20.7     | 0.64897 | 13.41667 | 0.782997 | 15.81667 | 0.7879  | 19.76667 | 0.736331 |
| 20.91667 | 0.63959 | 20.91667 | 0.69516 | 13.51667 | 0.937289 | 15.95    | 0.67953 | 19.98333 | 0.715491 |
| 21.11667 | 0.71532 | 21.11667 | 0.73488 | 13.61667 | 0.801786 | 16.06667 | 0.74604 | 20.18333 | 0.708643 |
| 21.31667 | 0.68008 | 21.31667 | 0.60511 | 13.71667 | 0.772061 | 16.2     | 0.73828 | 20.38333 | 0.710103 |
| 21.53333 | 0.61697 | 21.53333 | 0.74022 | 13.83333 | 0.805365 | 16.31667 | 0.71417 | 20.58333 | 0.754686 |
| 21.73333 | 0.67856 | 21.73333 | 0.70464 | 13.93333 | 0.796418 | 16.45    | 0.82123 | 20.78333 | 0.755155 |
| 21.93333 | 0.67829 | 21.93333 | 0.70541 | 14.03333 | 0.826541 | 16.56667 | 0.68973 | 21       | 0.740103 |
| 22.15    | 0.70975 | 22.13333 | 0.69498 | 14.13333 | 0.794032 | 16.7     | 0.66284 | 21.2     | 0.62469  |
| 22.35    | 0.65801 | 22.35    | 0.76423 | 14.23333 | 0.749295 | 16.81667 | 0.64669 | 21.4     | 0.752931 |
| 22.55    | 0.72507 | 22.55    | 0.81022 | 14.33333 | 0.760628 | 16.95    | 0.7211  | 21.6     | 0.789154 |

|          |         |          |         |          |          |          |         |          |          |
|----------|---------|----------|---------|----------|----------|----------|---------|----------|----------|
| 22.76667 | 0.71327 | 22.75    | 0.73466 | 14.43333 | 0.786576 | 17.06667 | 0.59975 | 21.81667 | 0.739582 |
| 22.96667 | 0.66548 | 22.96667 | 0.69836 | 14.53333 | 0.713704 | 17.2     | 0.68099 | 22.01667 | 0.638195 |
| 23.16667 | 0.7131  | 23.16667 | 0.76125 | 14.63333 | 0.757596 | 17.31667 | 0.66567 | 22.21667 | 0.748168 |
| 23.36667 | 0.7495  | 23.36667 | 0.72759 | 14.73333 | 0.812921 | 17.45    | 0.66352 | 22.41667 | 0.717351 |
| 23.58333 | 0.73303 | 23.58333 | 0.66227 | 14.85    | 0.611107 | 17.56667 | 0.66196 | 22.63333 | 0.726111 |
| 23.78333 | 0.78579 | 23.78333 | 0.79932 | 14.95    | 0.686961 | 17.7     | 0.5794  | 22.83333 | 0.702315 |
| 23.98333 | 0.78954 | 23.98333 | 0.92613 | 15.05    | 0.592914 | 17.83333 | 0.61512 | 23.03333 | 0.707548 |
| 24.2     | 0.6249  | 24.18333 | 0.73729 | 15.15    | 0.678561 | 17.95    | 0.63971 | 23.23333 | 0.758075 |
| 24.4     | 0.75267 | 24.4     | 0.7294  | 15.25    | 0.748201 | 18.08333 | 0.60638 | 23.43333 | 0.777421 |
| 24.6     | 0.78983 | 24.6     | 0.70651 | 15.35    | 0.68885  | 18.2     | 0.6361  | 23.65    | 0.743475 |
| 24.81667 | 0.77368 | 24.8     | 0.72475 | 15.45    | 0.657435 | 18.33333 | 0.58252 | 23.85    | 0.749785 |
| 25.01667 | 0.71498 | 25.01667 | 0.72514 | 15.55    | 0.644113 | 18.45    | 0.57852 | 24.05    | 0.740416 |
| 25.21667 | 0.8865  | 25.21667 | 0.79255 | 15.65    | 0.689447 | 18.58333 | 0.57725 | 24.25    | 0.78154  |
| 25.41667 | 0.75007 | 25.41667 | 0.77751 | 15.75    | 0.386229 | 18.7     | 0.71251 | 24.46667 | 0.818824 |
| 25.63333 | 0.77708 | 25.63333 | 0.78118 | 15.86667 | 0.745119 | 18.83333 | 0.57442 | 24.66667 | 0.736036 |
| 25.83333 | 0.79453 | 25.83333 | 0.7434  | 15.96667 | 0.532668 | 18.95    | 0.59277 | 24.86667 | 0.73216  |
| 26.03333 | 0.83361 | 26.03333 | 0.75852 | 16.06667 | 0.588689 | 19.08333 | 0.60604 | 25.06667 | 0.759118 |
| 26.25    | 0.75795 | 26.23333 | 0.81688 | 16.16667 | 0.398358 | 19.2     | 0.46619 | 25.28333 | 0.745092 |
| 26.45    | 0.76343 | 26.45    | 0.72909 | 16.26667 | 0.491809 | 19.33333 | 0.63049 | 25.48333 | 0.742224 |
| 26.65    | 0.81232 | 26.65    | 0.78638 | 16.36667 | 0.609616 | 19.46667 | 0.60858 | 25.68333 | 0.746447 |
| 26.86667 | 0.82297 | 26.85    | 0.79174 | 16.46667 | 0.519347 | 19.58333 | 0.64118 | 25.88333 | 0.780393 |
| 27.06667 | 0.82782 | 27.06667 | 0.79261 | 16.56667 | 0.586253 | 19.71667 | 0.65425 | 26.08333 | 0.779924 |
| 27.26667 | 0.72192 | 27.26667 | 0.79435 | 16.66667 | 0.491212 | 19.83333 | 0.55881 | 26.3     | 0.79004  |
| 27.48333 | 0.76762 | 27.46667 | 0.77947 | 16.76667 | 0.527598 | 19.96667 | 0.52114 | 26.5     | 0.767704 |
| 27.68333 | 0.76504 | 27.68333 | 0.79039 | 16.88333 | 0.506721 | 20.08333 | 0.56925 | 26.7     | 0.774084 |
| 27.88333 | 0.88985 | 27.88333 | 0.7242  | 16.98333 | 0.519098 | 20.21667 | 0.59687 | 26.9     | 0.827602 |
| 28.08333 | 0.82    | 28.08333 | 0.79194 | 17.08333 | 0.493697 | 20.33333 | 0.59462 | 27.11667 | 0.749576 |
| 28.3     | 0.71069 | 28.28333 | 0.84276 | 17.18333 | 0.513481 | 20.46667 | 0.49469 | 27.31667 | 0.752583 |
| 28.5     | 0.83514 | 28.5     | 0.72402 | 17.28333 | 0.388317 | 20.58333 | 0.60492 | 27.51667 | 0.805527 |
| 28.7     | 0.76068 | 28.7     | 0.82332 | 17.38333 | 0.534209 | 20.71667 | 0.57755 | 27.71667 | 0.73322  |
| 28.91667 | 0.83901 | 28.9     | 0.78638 | 17.48333 | 0.5273   | 20.83333 | 0.62068 | 27.93333 | 0.77059  |
| 29.11667 | 0.8048  | 29.11667 | 0.73631 | 17.58333 | 0.454925 | 20.96667 | 0.57852 | 28.13333 | 0.734715 |
| 29.31667 | 0.79824 | 29.31667 | 0.85791 | 17.68333 | 0.460592 | 21.08333 | 0.58643 | 28.33333 | 0.781158 |
| 29.53333 | 0.85085 | 29.51667 | 0.74633 | 17.78333 | 0.630493 | 21.21667 | 0.58057 | 28.53333 | 0.748168 |
| 29.73333 | 0.80769 | 29.73333 | 0.74212 | 17.9     | 0.407057 | 21.35    | 0.61073 | 28.75    | 0.82044  |
| 29.93333 | 0.71562 | 29.93333 | 0.7564  | 18       | 0.589633 | 21.46667 | 0.56896 | 28.95    | 0.72658  |
| 30.13333 | 0.818   | 30.13333 | 0.80722 | 18.1     | 0.40651  | 21.6     | 0.60048 | 29.15    | 0.780115 |
| 30.35    | 0.886   | 30.33333 | 0.81597 | 18.2     | 0.48644  | 21.71667 | 0.56779 | 29.35    | 0.801199 |
| 30.55    | 0.58905 | 30.55    | 0.76035 | 18.3     | 0.409691 | 21.85    | 0.60224 | 29.55    | 0.685699 |
| 30.75    | 0.80992 | 30.75    | 0.67542 | 18.4     | 0.487633 | 21.96667 | 0.65659 | 29.76667 | 0.814391 |
| 30.96667 | 0.76644 | 30.95    | 0.71585 | 18.5     | 0.474311 | 22.1     | 0.6097  | 29.96667 | 0.687819 |
| 31.16667 | 0.76494 | 31.16667 | 0.75471 | 18.6     | 0.436732 | 22.21667 | 0.65962 | 30.16667 | 0.703637 |
| 31.36667 | 0.75733 | 31.36667 | 0.75591 | 18.7     | 0.45582  | 22.35    | 0.55832 | 30.36667 | 0.718863 |
| 31.58333 | 0.78596 | 31.56667 | 0.6937  | 18.8     | 0.488329 | 22.46667 | 0.63405 | 30.58333 | 0.728736 |
| 31.78333 | 0.75467 | 31.78333 | 0.64277 | 18.91667 | 0.295463 | 22.6     | 0.61268 | 30.78333 | 0.722669 |
| 31.98333 | 0.72657 | 31.98333 | 0.86304 | 19.01667 | 0.427487 | 22.71667 | 0.56271 | 30.98333 | 0.759223 |
| 32.18333 | 0.88951 | 32.18333 | 0.76639 | 19.11667 | 0.441803 | 22.85    | 0.63073 | 31.18333 | 0.697901 |
| 32.4     | 0.71399 | 32.38333 | 0.80979 | 19.21667 | 0.460691 | 22.96667 | 0.59004 | 31.4     | 0.687924 |
| 32.6     | 0.81856 | 32.6     | 0.74075 | 19.31667 | 0.445978 | 23.1     | 0.62585 | 31.6     | 0.701916 |
| 32.8     | 0.76585 | 32.8     | 0.7393  | 19.41667 | 0.552353 | 23.23333 | 0.6543  | 31.8     | 0.697622 |

|          |         |          |         |          |          |          |         |          |          |
|----------|---------|----------|---------|----------|----------|----------|---------|----------|----------|
| 33.01667 | 0.74045 | 33       | 0.71931 | 19.51667 | 0.387124 | 23.35    | 0.6076  | 32       | 0.679598 |
| 33.21667 | 0.8277  | 33.21667 | 0.73023 | 19.61667 | 0.567762 | 23.48333 | 0.62302 | 32.2     | 0.669847 |
| 33.41667 | 0.73316 | 33.41667 | 0.78711 | 19.71667 | 0.44389  | 23.6     | 0.75165 | 32.41667 | 0.744865 |
| 33.63333 | 0.74034 | 33.61667 | 0.75591 | 19.81667 | 0.2891   | 23.73333 | 0.66191 | 32.61667 | 0.628862 |
| 33.83333 | 0.75565 | 33.83333 | 0.75599 | 19.93333 | 0.466756 | 23.85    | 0.54641 | 32.81667 | 0.67301  |
| 34.03333 | 0.70946 | 34.03333 | 0.71434 | 20.03333 | 0.366247 | 23.98333 | 0.66211 | 33.01667 | 0.645809 |
| 34.23333 | 0.77237 | 34.23333 | 0.7681  | 20.13333 | 0.565078 | 24.1     | 0.70002 | 33.23333 | 0.683126 |
| 34.45    | 0.69572 | 34.43333 | 0.6775  | 20.23333 | 0.469738 | 24.23333 | 0.61673 | 33.43333 | 0.63345  |
| 34.65    | 0.72824 | 34.65    | 0.80576 | 20.33333 | 0.400744 | 24.35    | 0.64459 | 33.63333 | 0.666893 |
| 34.85    | 0.73364 | 34.85    | 0.66172 | 20.43333 | 0.377481 | 24.48333 | 0.59926 | 33.83333 | 0.677408 |
| 35.06667 | 0.71862 | 35.05    | 0.71534 | 20.53333 | 0.456715 | 24.6     | 0.7172  | 34.05    | 0.730439 |
| 35.26667 | 0.73796 | 35.26667 | 0.65638 | 20.63333 | 0.468694 | 24.73333 | 0.70529 | 34.25    | 0.694772 |
| 35.46667 | 0.76979 | 35.46667 | 0.85693 | 20.73333 | 0.296059 | 24.86667 | 0.65591 | 34.45    | 0.712293 |
| 35.68333 | 0.70407 | 35.66667 | 0.64699 | 20.83333 | 0.448265 | 24.98333 | 0.6829  | 34.65    | 0.65556  |
| 35.88333 | 0.70138 | 35.88333 | 0.65479 | 20.95    | 0.543306 | 25.11667 | 0.61795 | 34.85    | 0.732316 |
| 36.08333 | 0.73914 | 36.08333 | 0.72047 | 21.05    | 0.217024 | 25.23333 | 0.693   | 35.06667 | 0.620484 |
| 36.28333 | 0.71202 | 36.28333 | 0.68116 | 21.15    | 0.498469 | 25.36667 | 0.59306 | 35.26667 | 0.741389 |
| 36.5     | 0.71727 | 36.48333 | 0.70971 | 21.25    | 0.267328 | 25.48333 | 0.58974 | 35.46667 | 0.687089 |
| 36.7     | 0.68774 | 36.7     | 0.67937 | 21.35    | 0.548177 | 25.61667 | 0.66333 | 35.66667 | 0.596949 |
| 36.9     | 0.70178 | 36.9     | 0.6756  | 21.45    | 0.556031 | 25.73333 | 0.6361  | 35.88333 | 0.667188 |
| 37.11667 | 0.64209 | 37.1     | 0.70802 | 21.55    | 0.447668 | 25.86667 | 0.62663 | 36.08333 | 0.652188 |
| 37.31667 | 0.73208 | 37.31667 | 0.56654 | 21.65    | 0.366545 | 25.98333 | 0.60677 | 36.28333 | 0.688984 |
| 37.51667 | 0.7233  | 37.51667 | 0.66221 | 21.75    | 0.53237  | 26.11667 | 0.76473 | 36.48333 | 0.638839 |
| 37.73333 | 0.76014 | 37.71667 | 0.72812 | 21.85    | 0.417645 | 26.23333 | 0.64191 | 36.7     | 0.688202 |
| 37.93333 | 0.71195 | 37.93333 | 0.74947 | 21.96667 | 0.441902 | 26.36667 | 0.5348  | 36.9     | 0.641898 |
| 38.13333 | 0.73226 | 38.13333 | 0.64675 | 22.06667 | 0.420876 | 26.48333 | 0.6927  | 37.1     | 0.63783  |
| 38.33333 | 0.65361 | 38.33333 | 0.6388  | 22.16667 | 0.511493 | 26.61667 | 0.68665 | 37.3     | 0.637448 |
| 38.55    | 0.70798 | 38.55    | 0.66682 | 22.26667 | 0.529388 | 26.75    | 0.65333 | 37.5     | 0.684239 |
| 38.75    | 0.70519 | 38.75    | 0.73105 | 22.36667 | 0.405615 | 26.86667 | 0.6442  | 37.71667 | 0.676469 |
| 38.95    | 0.64007 | 38.95    | 0.627   | 22.46667 | 0.504285 | 27       | 0.66494 | 37.91667 | 0.673776 |
| 39.16667 | 0.6892  | 39.15    | 0.70378 | 22.56667 | 0.473118 | 27.11667 | 0.78405 | 38.11667 | 0.55101  |
| 39.36667 | 0.6904  | 39.36667 | 0.62773 | 22.66667 | 0.592914 | 27.25    | 0.66777 | 38.31667 | 0.685873 |
| 39.56667 | 0.71777 | 39.56667 | 0.65005 | 22.76667 | 0.32479  | 27.36667 | 0.5348  | 38.53333 | 0.589597 |
| 39.78333 | 0.74738 | 39.76667 | 0.69396 | 22.86667 | 0.612897 | 27.5     | 0.63229 | 38.73333 | 0.710241 |
| 39.98333 | 0.68933 | 39.98333 | 0.59319 | 22.98333 | 0.451595 | 27.61667 | 0.72257 | 38.93333 | 0.616608 |
| 40.18333 | 0.76511 | 40.18333 | 0.67277 | 23.08333 | 0.461387 | 27.75    | 0.62844 | 39.13333 | 0.688793 |
| 40.38333 | 0.65755 | 40.38333 | 0.68123 | 23.18333 | 0.512686 | 27.86667 | 0.57637 | 39.35    | 0.671829 |
| 40.6     | 0.67469 | 40.6     | 0.58048 | 23.28333 | 0.41675  | 28       | 0.70534 | 39.55    | 0.654725 |
| 40.8     | 0.6642  | 40.8     | 0.62798 | 23.38333 | 0.491212 | 28.11667 | 0.73086 | 39.75    | 0.636475 |
| 41       | 0.67968 | 41       | 0.75771 | 23.48333 | 0.476101 | 28.25    | 0.56901 | 39.95    | 0.660565 |
| 41.21667 | 0.67036 | 41.2     | 0.63617 | 23.58333 | 0.573826 | 28.38333 | 0.73769 | 40.16667 | 0.669464 |
| 41.41667 | 0.70066 | 41.41667 | 0.60505 | 23.68333 | 0.330258 | 28.5     | 0.64576 | 40.36667 | 0.616921 |
| 41.61667 | 0.68203 | 41.61667 | 0.65268 | 23.78333 | 0.473118 | 28.63333 | 0.74638 | 40.56667 | 0.589719 |
| 41.83333 | 0.63749 | 41.81667 | 0.77073 | 23.88333 | 0.455572 | 28.75    | 0.67372 | 40.76667 | 0.708173 |
| 42.03333 | 0.63825 | 42.03333 | 0.67811 | 24       | 0.456715 | 28.88333 | 0.61678 | 40.96667 | 0.654899 |
| 42.23333 | 0.67348 | 42.23333 | 0.53848 | 24.1     | 0.58168  | 29       | 0.66377 | 41.18333 | 0.605762 |
| 42.43333 | 0.63928 | 42.43333 | 0.69152 | 24.2     | 0.377779 | 29.13333 | 0.6321  | 41.38333 | 0.63345  |
| 42.65    | 0.71877 | 42.65    | 0.68978 | 24.3     | 0.615879 | 29.25    | 0.64727 | 41.58333 | 0.629644 |
| 42.85    | 0.64176 | 42.85    | 0.65826 | 24.4     | 0.448414 | 29.38333 | 0.7576  | 41.78333 | 0.614209 |
| 43.05    | 0.65194 | 43.05    | 0.71571 | 24.5     | 0.446773 | 29.5     | 0.67519 | 42       | 0.657993 |

|          |         |          |         |          |          |          |         |          |          |
|----------|---------|----------|---------|----------|----------|----------|---------|----------|----------|
| 43.26667 | 0.65342 | 43.25    | 0.68691 | 24.6     | 0.506721 | 29.63333 | 0.64205 | 42.2     | 0.577239 |
| 43.46667 | 0.61397 | 43.46667 | 0.627   | 24.7     | 0.551458 | 29.75    | 0.65215 | 42.4     | 0.663068 |
| 43.66667 | 0.66711 | 43.66667 | 0.68624 | 24.8     | 0.468247 | 29.88333 | 0.61326 | 42.6     | 0.560396 |
| 43.88333 | 0.63736 | 43.86667 | 0.61644 | 24.9     | 0.489721 | 30       | 0.66333 | 42.81667 | 0.62754  |
| 44.08333 | 0.66675 | 44.08333 | 0.66282 | 25.01667 | 0.323299 | 30.13333 | 0.64293 | 43.01667 | 0.583809 |
| 44.28333 | 0.65745 | 44.28333 | 0.61212 | 25.11667 | 0.587446 | 30.26667 | 0.62888 | 43.21667 | 0.665467 |
| 44.48333 | 0.60765 | 44.48333 | 0.69406 | 25.21667 | 0.453434 | 30.38333 | 0.69944 | 43.41667 | 0.569104 |
| 44.7     | 0.70064 | 44.7     | 0.59496 | 25.31667 | 0.55797  | 30.51667 | 0.66245 | 43.61667 | 0.634232 |
| 44.9     | 0.63693 | 44.9     | 0.61807 | 25.41667 | 0.405317 | 30.63333 | 0.63366 | 43.83333 | 0.624134 |
| 45.1     | 0.67725 | 45.1     | 0.60006 | 25.51667 | 0.514873 | 30.76667 | 0.60682 | 44.03333 | 0.621874 |
| 45.31667 | 0.68178 | 45.3     | 0.62162 | 25.61667 | 0.521832 | 30.88333 | 0.60848 | 44.23333 | 0.602511 |
| 45.51667 | 0.5931  | 45.51667 | 0.62863 | 25.71667 | 0.438422 | 31.01667 | 0.67894 | 44.43333 | 0.63538  |
| 45.71667 | 0.6056  | 45.71667 | 0.6937  | 25.81667 | 0.521335 | 31.13333 | 0.69973 | 44.65    | 0.601468 |
| 45.93333 | 0.68352 | 45.91667 | 0.55523 | 25.91667 | 0.389808 | 31.26667 | 0.61546 | 44.85    | 0.653422 |
| 46.13333 | 0.65967 | 46.13333 | 0.66225 | 26.03333 | 0.602955 | 31.38333 | 0.64459 | 45.05    | 0.618398 |
| 46.33333 | 0.6395  | 46.33333 | 0.59411 | 26.13333 | 0.385036 | 31.51667 | 0.64552 | 45.25    | 0.621196 |
| 46.53333 | 0.61175 | 46.53333 | 0.57084 | 26.23333 | 0.598978 | 31.63333 | 0.70715 | 45.46667 | 0.621509 |
| 46.75    | 0.62301 | 46.75    | 0.78803 | 26.33333 | 0.333539 | 31.76667 | 0.62966 | 45.66667 | 0.627471 |
| 46.95    | 0.57467 | 46.95    | 0.61991 | 26.43333 | 0.535154 | 31.88333 | 0.66909 | 45.86667 | 0.513257 |
| 47.15    | 0.66169 | 47.15    | 0.58873 | 26.53333 | 0.621347 | 32.01667 | 0.65601 | 46.06667 | 0.653231 |
| 47.36667 | 0.65775 | 47.35    | 0.54573 | 26.63333 | 0.476847 | 32.15    | 0.68319 | 46.26667 | 0.624846 |
| 47.56667 | 0.60998 | 47.56667 | 0.77837 | 26.73333 | 0.37927  | 32.26667 | 0.70529 | 46.48333 | 0.559231 |
| 47.76667 | 0.5729  | 47.76667 | 0.54687 | 26.83333 | 0.560206 | 32.4     | 0.59628 | 46.68333 | 0.620101 |
| 47.98333 | 0.66824 | 47.96667 | 0.56862 | 26.93333 | 0.426194 | 32.51667 | 0.69944 | 46.88333 | 0.574597 |
| 48.18333 | 0.62564 | 48.18333 | 0.56945 | 27.05    | 0.59023  | 32.65    | 0.65718 | 47.08333 | 0.596845 |
| 48.38333 | 0.58792 | 48.38333 | 0.57033 | 27.15    | 0.50349  | 32.76667 | 0.6563  | 47.3     | 0.562586 |
| 48.6     | 0.69242 | 48.58333 | 0.63935 | 27.25    | 0.421323 | 32.9     | 0.66938 | 47.5     | 0.580819 |
| 48.8     | 0.6411  | 48.8     | 0.53452 | 27.35    | 0.480376 | 33.01667 | 0.63766 | 47.7     | 0.61739  |
| 49       | 0.54996 | 49       | 0.60719 | 27.45    | 0.482463 | 33.15    | 0.59702 | 47.9     | 0.612037 |
| 49.2     | 0.7234  | 49.2     | 0.5646  | 27.55    | 0.445531 | 33.26667 | 0.60643 | 48.11667 | 0.568843 |
| 49.41667 | 0.57613 | 49.4     | 0.61905 | 27.65    | 0.442498 | 33.4     | 0.65557 | 48.31667 | 0.599174 |
| 49.61667 | 0.62298 | 49.61667 | 0.67701 | 27.75    | 0.471826 | 33.51667 | 0.64469 | 48.51667 | 0.599244 |
| 49.81667 | 0.57606 | 49.81667 | 0.62553 | 27.85    | 0.471826 | 33.65    | 0.62454 | 48.71667 | 0.561874 |
| 50.03333 | 0.66031 | 50.01667 | 0.638   | 27.95    | 0.471826 | 33.78333 | 0.61873 | 48.91667 | 0.56342  |
| 50.23333 | 0.65322 | 50.23333 | 0.59062 | 28.06667 | 0.490466 | 33.9     | 0.64235 | 49.13333 | 0.536462 |
| 50.43333 | 0.5336  | 50.43333 | 0.55241 | 28.16667 | 0.554838 | 34.03333 | 0.56837 | 49.33333 | 0.548351 |
| 50.65    | 0.64795 | 50.63333 | 0.74499 | 28.26667 | 0.478785 | 34.15    | 0.60702 | 49.53333 | 0.560552 |
| 50.85    | 0.65916 | 50.85    | 0.65793 | 28.36667 | 0.578101 | 34.28333 | 0.61473 | 49.73333 | 0.572859 |
| 51.05    | 0.65425 | 51.05    | 0.62802 | 28.46667 | 0.425498 | 34.4     | 0.64649 | 49.95    | 0.602737 |
| 51.25    | 0.61047 | 51.25    | 0.61202 | 28.56667 | 0.496382 | 34.53333 | 0.63756 | 50.15    | 0.554782 |
| 51.46667 | 0.60693 | 51.45    | 0.6122  | 28.66667 | 0.450651 | 34.65    | 0.61268 | 50.35    | 0.571972 |
| 51.66667 | 0.62052 | 51.66667 | 0.57644 | 28.76667 | 0.381358 | 34.78333 | 0.57042 | 50.55    | 0.559127 |
| 51.86667 | 0.66061 | 51.86667 | 0.55217 | 28.86667 | 0.594405 | 34.9     | 0.53124 | 50.76667 | 0.560709 |
| 52.08333 | 0.58513 | 52.06667 | 0.57552 | 28.96667 | 0.465811 | 35.03333 | 0.6807  | 50.96667 | 0.553409 |
| 52.28333 | 0.71099 | 52.28333 | 0.61123 | 29.08333 | 0.511791 | 35.15    | 0.57594 | 51.16667 | 0.602824 |
| 52.48333 | 0.56556 | 52.48333 | 0.48596 | 29.18333 | 0.346562 | 35.28333 | 0.6117  | 51.36667 | 0.52718  |
| 52.7     | 0.62328 | 52.68333 | 0.58123 | 29.28333 | 0.56478  | 35.4     | 0.56379 | 51.56667 | 0.535975 |
| 52.9     | 0.56641 | 52.9     | 0.55523 | 29.38333 | 0.517855 | 35.53333 | 0.63493 | 51.78333 | 0.509764 |
| 53.1     | 0.59343 | 53.1     | 0.5688  | 29.48333 | 0.516066 | 35.66667 | 0.60463 | 51.98333 | 0.57331  |
| 53.3     | 0.65145 | 53.3     | 0.71992 | 29.58333 | 0.426493 | 35.78333 | 0.53685 | 52.18333 | 0.5848   |

|          |         |          |         |          |          |          |         |          |          |
|----------|---------|----------|---------|----------|----------|----------|---------|----------|----------|
| 53.51667 | 0.60906 | 53.5     | 0.46939 | 29.68333 | 0.548774 | 35.91667 | 0.60136 | 52.38333 | 0.590796 |
| 53.71667 | 0.60712 | 53.71667 | 0.5635  | 29.78333 | 0.494294 | 36.03333 | 0.56837 | 52.6     | 0.545274 |
| 53.91667 | 0.6236  | 53.91667 | 0.66576 | 29.88333 | 0.48639  | 36.16667 | 0.62771 | 52.8     | 0.587216 |
| 54.13333 | 0.64219 | 54.11667 | 0.59985 | 29.98333 | 0.383843 | 36.28333 | 0.61863 | 53       | 0.579898 |
| 54.33333 | 0.61244 | 54.33333 | 0.59484 | 30.1     | 0.528195 | 36.41667 | 0.58535 | 53.2     | 0.593768 |
| 54.53333 | 0.56674 | 54.53333 | 0.64249 | 30.2     | 0.359288 | 36.53333 | 0.6444  | 53.41667 | 0.553635 |
| 54.75    | 0.63969 | 54.73333 | 0.55321 | 30.3     | 0.58685  | 36.66667 | 0.60375 | 53.61667 | 0.61108  |
| 54.95    | 0.55679 | 54.95    | 0.61224 | 30.4     | 0.457808 | 36.78333 | 0.69524 | 53.81667 | 0.551618 |
| 55.15    | 0.57784 | 55.15    | 0.60841 | 30.5     | 0.386229 | 36.91667 | 0.52631 | 54.01667 | 0.541676 |
| 55.35    | 0.58181 | 55.35    | 0.57406 | 30.6     | 0.539627 | 37.03333 | 0.58477 | 54.23333 | 0.572859 |
| 55.56667 | 0.59181 | 55.55    | 0.55541 | 30.7     | 0.500159 | 37.16667 | 0.58199 | 54.43333 | 0.498605 |
| 55.76667 | 0.57715 | 55.76667 | 0.64061 | 30.8     | 0.546189 | 37.28333 | 0.56037 | 54.63333 | 0.551862 |
| 55.96667 | 0.55955 | 55.96667 | 0.44989 | 30.9     | 0.405317 | 37.41667 | 0.57652 | 54.83333 | 0.512788 |
| 56.18333 | 0.53906 | 56.16667 | 0.63782 | 31       | 0.474908 | 37.55    | 0.55588 | 55.03333 | 0.552157 |
| 56.38333 | 0.612   | 56.38333 | 0.59064 | 31.11667 | 0.515171 | 37.66667 | 0.63791 | 55.25    | 0.513831 |
| 56.58333 | 0.61809 | 56.58333 | 0.60096 | 31.21667 | 0.525709 | 37.8     | 0.56008 | 55.45    | 0.526919 |
| 56.8     | 0.57876 | 56.78333 | 0.5461  | 31.31667 | 0.53575  | 37.91667 | 0.57633 | 55.65    | 0.532916 |
| 57       | 0.6218  | 57       | 0.6034  | 31.41667 | 0.409194 | 38.05    | 0.57257 | 55.85    | 0.585165 |
| 57.2     | 0.5823  | 57.2     | 0.50004 | 31.51667 | 0.5103   | 38.16667 | 0.63878 | 56.06667 | 0.562847 |
| 57.4     | 0.56454 | 57.4     | 0.52527 | 31.61667 | 0.533861 | 38.3     | 0.60555 | 56.26667 | 0.538808 |
| 57.61667 | 0.60225 | 57.6     | 0.61237 | 31.71667 | 0.49156  | 38.41667 | 0.56779 | 56.46667 | 0.517968 |
|          | 0.56467 | 57.81667 | 0.59289 | 31.81667 | 0.498469 | 38.55    | 0.57315 | 56.66667 | 0.523269 |
|          | 0.52537 | 58.01667 | 0.59488 | 31.91667 | 0.438323 | 38.66667 | 0.60107 | 56.88333 | 0.58068  |
|          | 0.56467 | 58.21667 | 0.55034 | 32.01667 | 0.614984 | 38.8     | 0.61795 | 57.08333 | 0.512718 |
|          | 0.57065 | 58.43333 | 0.61119 | 32.13333 | 0.365352 | 38.91667 | 0.56959 | 57.28333 | 0.51576  |
|          | 0.49405 | 58.63333 | 0.52283 | 32.23333 | 0.495288 | 39.05    | 0.64205 | 57.48333 | 0.541398 |
|          | 0.63001 | 58.83333 | 0.51109 | 32.33333 | 0.582078 | 39.18333 | 0.58208 | 57.68333 | 0.547986 |
|          | 0.5627  | 59.05    | 0.62737 | 32.43333 | 0.385335 | 39.3     | 0.57579 | 57.9     | 0.541746 |
|          | 0.60006 | 59.25    | 0.51818 | 32.53333 | 0.628903 | 39.43333 | 0.5106  | 58.1     | 0.527545 |
|          | 0.50991 | 59.45    | 0.52776 | 32.63333 | 0.483408 | 39.55    | 0.58086 | 58.3     | 0.545778 |
|          | 0.56756 | 59.66667 | 0.63452 | 32.73333 | 0.466756 | 39.68333 | 0.57555 | 58.5     | 0.520558 |
|          | 0.56659 | 59.86667 | 0.54113 | 32.83333 | 0.511195 | 39.8     | 0.57696 | 58.71667 | 0.572702 |
|          | 0.4951  | 60.06667 | 0.51928 | 32.93333 | 0.591125 | 39.93333 | 0.58623 | 58.91667 | 0.494989 |
|          | 0.58412 | 60.26667 | 0.57206 | 33.03333 | 0.38444  | 40.05    | 0.56418 | 59.11667 | 0.513883 |
|          | 0.60315 | 60.48333 | 0.515   | 33.15    | 0.553894 | 40.18333 | 0.59897 | 59.31667 | 0.508651 |
|          | 0.51203 | 60.68333 | 0.60503 | 33.25    | 0.456715 | 40.3     | 0.53304 | 59.53333 | 0.533124 |
|          |         | 60.88333 | 0.54386 | 33.35    | 0.486838 | 40.43333 | 0.55905 | 59.73333 |          |
|          |         | 61.1     | 0.45472 | 33.45    | 0.452241 | 40.55    | 0.58799 | 59.93333 |          |
|          |         | 61.3     | 0.5117  | 33.55    | 0.537689 | 40.68333 | 0.58218 | 60.13333 |          |
|          |         | 61.5     | 0.69779 | 33.65    | 0.533861 | 40.8     | 0.63552 | 60.33333 |          |
|          |         | 61.71667 | 0.50355 | 33.75    | 0.450352 | 40.93333 | 0.55676 | 60.55    |          |
|          |         | 61.91667 | 0.51225 | 33.85    | 0.609616 | 41.06667 | 0.52499 | 60.75    |          |
|          |         | 62.11667 | 0.62822 | 33.95    | 0.407703 | 41.18333 | 0.56125 | 60.95    |          |
|          |         | 62.31667 | 0.54966 | 34.05    | 0.566917 | 41.31667 | 0.61263 | 61.15    |          |
|          |         | 62.53333 | 0.54088 | 34.16667 | 0.373802 | 41.43333 | 0.53275 | 61.36667 |          |
|          |         | 62.73333 | 0.49489 | 34.26667 | 0.571142 | 41.56667 | 0.56237 | 61.56667 |          |
|          |         | 62.93333 | 0.46797 | 34.36667 | 0.469142 | 41.68333 | 0.50455 | 61.76667 |          |
|          |         | 63.15    | 0.53695 | 34.46667 | 0.494294 | 41.81667 | 0.52485 |          |          |
|          |         | 63.35    | 0.55046 | 34.56667 | 0.468694 | 41.93333 | 0.55471 |          |          |
|          |         | 63.55    | 0.52264 | 34.66667 | 0.355609 | 42.06667 | 0.59985 |          |          |

|          |         |          |          |          |         |
|----------|---------|----------|----------|----------|---------|
| 63.76667 | 0.526   | 34.76667 | 0.579294 | 42.18333 | 0.53988 |
| 63.96667 | 0.46899 | 34.86667 | 0.470931 | 42.31667 | 0.5125  |
| 64.16667 | 0.54459 | 34.96667 | 0.538285 | 42.43333 | 0.60614 |
| 64.36667 | 0.51048 | 35.06667 | 0.33503  | 42.56667 | 0.58355 |
| 64.58333 | 0.50387 | 35.18333 | 0.539329 | 42.68333 | 0.53002 |
| 64.78333 | 0.5657  | 35.28333 | 0.466358 | 42.81667 | 0.57047 |
| 64.98333 | 0.49825 | 35.38333 | 0.60892  | 42.95    | 0.48278 |
| 65.2     | 0.60181 | 35.48333 | 0.467004 | 43.06667 | 0.54388 |
| 65.4     | 0.3909  | 35.58333 | 0.474311 | 43.2     | 0.57101 |
| 65.6     | 0.51769 | 35.68333 | 0.534855 | 43.31667 | 0.5592  |
| 65.81667 | 0.48621 | 35.78333 | 0.380463 | 43.45    | 0.60995 |
| 66.01667 | 0.57031 | 35.88333 | 0.435092 | 43.56667 | 0.52519 |
| 66.21667 | 0.53346 | 35.98333 | 0.629201 | 43.7     | 0.57345 |
| 66.41667 | 0.52509 | 36.08333 | 0.30272  | 43.81667 | 0.6119  |
| 66.63333 | 0.59558 | 36.2     | 0.452738 | 43.95    | 0.52475 |
| 66.83333 | 0.48449 | 36.3     | 0.470534 | 44.06667 | 0.53578 |
|          | 0.55368 | 36.4     | 0.453683 | 44.2     | 0.60585 |
|          | 0.52503 | 36.5     | 0.490914 | 44.31667 | 0.54627 |
|          | 0.54822 | 36.6     | 0.398656 | 44.45    | 0.56457 |
|          | 0.53713 | 36.7     | 0.60385  | 44.58333 | 0.50269 |
|          | 0.4707  | 36.8     | 0.442101 | 44.7     | 0.54378 |
|          | 0.36461 | 36.9     | 0.496083 | 44.83333 | 0.5632  |
|          | 0.541   | 37       | 0.404422 | 44.95    | 0.59687 |
|          | 0.50424 | 37.1     | 0.579891 | 45.08333 | 0.51592 |
|          | 0.46793 | 37.21667 | 0.377779 | 45.2     | 0.50123 |
|          | 0.52857 | 37.31667 | 0.475654 | 45.33333 | 0.58101 |
|          | 0.52056 | 37.41667 | 0.543604 | 45.45    | 0.61326 |
|          | 0.53917 | 37.51667 | 0.471826 | 45.58333 | 0.53661 |
|          | 0.5364  | 37.61667 | 0.448066 | 45.7     | 0.49742 |
|          | 0.48635 | 37.71667 | 0.510449 | 45.83333 | 0.52651 |
|          | 0.46793 | 37.81667 | 0.346861 | 45.95    | 0.54212 |
|          |         | 37.91667 | 0.567464 | 46.08333 | 0.56642 |
|          |         | 38.01667 | 0.416153 | 46.2     | 0.55412 |
|          |         | 38.11667 | 0.486042 | 46.33333 | 0.53524 |
|          |         | 38.23333 | 0.468694 | 46.46667 | 0.48962 |
|          |         | 38.33333 | 0.459797 | 46.58333 | 0.58482 |
|          |         | 38.43333 | 0.431662 | 46.71667 | 0.54427 |
|          |         | 38.53333 | 0.529686 | 46.83333 |         |
|          |         | 38.63333 | 0.496978 | 46.96667 |         |
|          |         | 38.73333 | 0.398358 | 47.08333 |         |
|          |         | 38.83333 | 0.532072 |          |         |
|          |         | 38.93333 | 0.360779 |          |         |
|          |         | 39.03333 | 0.528493 |          |         |
|          |         | 39.13333 | 0.487484 |          |         |
|          |         | 39.25    | 0.52213  |          |         |
|          |         | 39.35    | 0.433153 |          |         |
|          |         | 39.45    | 0.551756 |          |         |
|          |         | 39.55    | 0.497127 |          |         |
|          |         | 39.65    | 0.413171 |          |         |
|          |         | 39.75    | 0.485744 |          |         |

|          |          |
|----------|----------|
| 39.85    | 0.467154 |
| 39.95    | 0.454925 |
| 40.05    | 0.474709 |
| 40.15    | 0.500657 |
| 40.26667 | 0.403726 |
| 40.36667 | 0.374399 |
| 40.46667 | 0.442001 |
| 40.56667 | 0.448265 |
| 40.66667 | 0.592914 |
| 40.76667 | 0.331451 |
| 40.86667 | 0.49151  |
| 40.96667 | 0.45582  |
| 41.06667 | 0.566569 |
| 41.16667 | 0.319919 |
| 41.28333 | 0.585657 |
| 41.38333 | 0.4592   |
| 41.48333 | 0.435539 |
| 41.58333 | 0.385931 |
| 41.68333 | 0.407107 |
| 41.78333 | 0.478387 |
| 41.88333 | 0.517706 |
| 41.98333 | 0.323001 |
| 42.08333 | 0.494294 |
| 42.18333 | 0.453136 |
| 42.3     | 0.462282 |
| 42.4     | 0.40318  |
| 42.5     | 0.402235 |
| 42.6     | 0.397463 |
| 42.7     | 0.516961 |
| 42.8     | 0.423908 |
| 42.9     | 0.447668 |
| 43       | 0.350539 |
| 43.1     | 0.610212 |
| 43.2     | 0.430072 |
| 43.31667 | 0.459747 |
| 43.41667 | 0.424703 |
| 43.51667 | 0.600768 |
| 43.61667 | 0.285124 |
| 43.71667 | 0.518899 |
| 43.81667 | 0.431762 |
| 43.91667 | 0.453037 |
| 44.01667 | 0.395574 |
| 44.11667 | 0.575119 |
| 44.21667 | 0.436732 |
| 44.33333 | 0.436931 |
| 44.43333 | 0.470335 |
| 44.53333 | 0.38444  |
| 44.63333 | 0.490566 |
| 44.73333 | 0.437826 |
| 44.83333 | 0.423411 |



|          |          |
|----------|----------|
| 44.93333 | 0.45582  |
| 45.03333 | 0.541815 |
| 45.13333 | 0.414563 |
| 45.23333 | 0.494592 |
| 45.35    | 0.435838 |
| 45.45    | 0.463972 |
| 45.55    | 0.289697 |
| 45.65    | 0.43027  |
| 45.75    | 0.418539 |
| 45.85    | 0.418639 |
| 45.95    | 0.363264 |
| 46.05    | 0.466905 |
| 46.15    | 0.389808 |
| 46.25    | 0.550563 |
| 46.36667 | 0.352329 |
| 46.46667 | 0.526007 |
| 46.56667 | 0.436036 |
| 46.66667 | 0.347755 |
| 46.76667 | 0.515171 |
| 46.86667 | 0.409393 |
| 46.96667 | 0.356852 |
| 47.06667 | 0.512388 |
| 47.16667 | 0.338709 |
| 47.26667 | 0.521534 |
| 47.38333 | 0.342984 |
| 47.48333 | 0.460145 |
| 47.58333 | 0.382253 |
| 47.68333 | 0.429773 |
| 47.78333 | 0.348948 |
| 47.88333 | 0.485595 |
| 47.98333 | 0.421919 |
| 48.08333 | 0.458504 |
| 48.18333 | 0.349943 |
| 48.28333 | 0.436335 |
| 48.4     | 0.400843 |
| 48.5     | 0.365054 |
| 48.6     | 0.454329 |
| 48.7     | 0.410685 |
| 48.8     | 0.468844 |
| 48.9     | 0.424703 |
| 49       | 0.448563 |
| 49.1     | 0.403428 |
| 49.2     | 0.260667 |
| 49.3     | 0.455373 |
| 49.41667 | 0.405317 |
| 49.51667 | 0.244264 |
| 49.61667 | 0.558715 |
| 49.71667 | 0.39637  |
| 49.81667 | 0.377182 |
| 49.91667 | 0.451844 |

|          |          |
|----------|----------|
| 50.01667 | 0.368334 |
| 50.11667 | 0.454329 |
| 50.21667 | 0.353223 |
| 50.31667 | 0.450452 |
| 50.43333 | 0.270609 |
| 50.53333 | 0.558119 |
| 50.63333 | 0.279954 |
| 50.73333 | 0.421969 |
| 50.83333 | 0.52213  |
| 50.93333 | 0.292679 |
| 51.03333 | 0.375294 |
| 51.13333 | 0.436832 |
| 51.23333 | 0.345668 |
| 51.33333 | 0.319323 |
| 51.45    | 0.463972 |
| 51.55    | 0.44737  |
| 51.65    | 0.419981 |
| 51.75    | 0.396767 |
| 51.85    | 0.374399 |
| 51.95    | 0.368931 |
| 52.05    | 0.435987 |
| 52.15    | 0.315048 |
| 52.25    | 0.34865  |
| 52.35    | 0.420925 |
| 52.46667 | 0.420428 |
| 52.56667 | 0.452838 |
| 52.66667 | 0.387124 |
| 52.76667 | 0.355013 |
| 52.86667 | 0.355609 |
| 52.96667 | 0.421025 |
| 53.06667 | 0.526007 |
| 53.16667 | 0.259375 |
| 53.26667 | 0.504235 |
| 53.36667 | 0.468247 |
| 53.48333 | 0.440411 |
| 53.58333 | 0.335329 |
| 53.68333 | 0.294171 |
| 53.78333 | 0.607429 |
| 53.88333 | 0.343829 |
| 53.98333 | 0.607727 |
| 54.08333 | 0.259077 |
| 54.18333 | 0.470931 |
| 54.28333 | 0.381954 |
| 54.38333 | 0.390305 |
| 54.5     | 0.286317 |
| 54.6     | 0.489124 |
| 54.7     | 0.619259 |
| 54.8     | 0.332495 |
| 54.9     | 0.551756 |
| 55       | 0.36744  |

|          |          |
|----------|----------|
| 55.1     | 0.344276 |
| 55.2     | 0.61409  |
| 55.3     | 0.360033 |
| 55.4     | 0.587745 |
| 55.51667 | 0.223983 |
| 55.61667 | 0.3402   |
| 55.71667 | 0.534855 |
| 55.81667 | 0.344475 |
|          | 0.428381 |
|          | 0.36565  |
|          | 0.502744 |
|          | 0.363065 |
|          | 0.519048 |
|          | 0.333241 |
|          | 0.392592 |
|          | 0.526007 |
|          | 0.390305 |
|          | 0.377779 |
|          | 0.358989 |
|          | 0.341691 |
|          | 0.373802 |
|          | 0.460393 |
|          | 0.412574 |
|          | 0.43892  |
|          | 0.345966 |
|          | 0.492007 |
|          | 0.234024 |
|          | 0.531177 |
|          | 0.303913 |
|          | 0.381805 |
|          | 0.312662 |
|          | 0.294171 |
|          | 0.476996 |
|          | 0.41675  |
|          | 0.391647 |
|          | 0.457013 |
|          | 0.429177 |
|          | 0.373504 |
|          | 0.421025 |
|          | 0.375095 |
|          | 0.440411 |
|          | 0.405516 |
|          | 0.473715 |
|          | 0.437528 |
|          | 0.395475 |
|          | 0.317831 |
|          | 0.462481 |
|          | 0.397861 |
|          | 0.437031 |
|          | 0.310872 |

0.350241

0.404621

0.311767

0.424703
